# Supplementary material for: Design, Synthesis and Biological Evaluation of C(6)-Modified Celastrol Derivatives as Potential Antitumor Agents
Source: PubMed Central journal article supplement (PMC6271447; doi:10.3390/molecules190710177), 2014-07-14
Supplement: molecules-19-10177-s001.pdf [file molecules-19-10177-s001.pdf]

# Supplementary Information

## Contents

|                                                                                                                                                                               |     |
|-------------------------------------------------------------------------------------------------------------------------------------------------------------------------------|-----|
| Figure S1. IC <sub>50</sub> values (μg/mL) of celastrol and 1 analogues on BGC823. ....                                                                                       | S2  |
| Figure S2. IC <sub>50</sub> values (μg/mL) of celastrol and 1 analogues on H4. ....                                                                                           | S3  |
| Figure S3. IC <sub>50</sub> values (μg/mL) of celastrol and 1 analogues on Bel7402. ....                                                                                      | S4  |
| Figure S4. IC <sub>50</sub> values (μg/mL) of NST001A on human cancer cell lines. ....                                                                                        | S5  |
| Figure S5. IC <sub>50</sub> values (μg/mL) of NST001 on human cancer cell lines. ....                                                                                         | S5  |
| Table S1. The Mw of the Compounds (g/mol). ....                                                                                                                               | S6  |
| Figure S6. The inhibitory rate (at concentrations of 0.1, 10 μg/mL for 72 h) on Colo 205 growth. The results are expressed as the percentage of that of the treat cells. .... | S6  |
| Scheme S1. Synthetic scheme of the designed compounds. ....                                                                                                                   | S7  |
| Table S2. The change of the mice body weight and the inhibitory rate of tumor(T/C) of different drug loaded system against Colo 205 tumor in nude mice (mean ±SD). ....       | S8  |
| Figure S7. Effects of NST001A on the growth of Colo 205 xenografts in nude mice. ....                                                                                         | S8  |
| <sup>1</sup> H-NMR (NST001A) .....                                                                                                                                            | S9  |
| <sup>1</sup> H-NMR (NST001B) .....                                                                                                                                            | S9  |
| <sup>1</sup> H-NMR (NST6A-A) .....                                                                                                                                            | S10 |
| <sup>1</sup> H-NMR (NST6A-B) .....                                                                                                                                            | S10 |
| <sup>1</sup> H-NMR (NST6A-C) .....                                                                                                                                            | S11 |
| <sup>1</sup> H-NMR (NST6A-D) .....                                                                                                                                            | S11 |
| <sup>13</sup> C-NMR (NST001A) .....                                                                                                                                           | S12 |
| <sup>13</sup> C-NMR (NST00B) .....                                                                                                                                            | S12 |
| <sup>13</sup> C-NMR (NST6A-A) .....                                                                                                                                           | S13 |
| <sup>13</sup> C-NMR (NST6A-B) .....                                                                                                                                           | S13 |
| <sup>13</sup> C-NMR (NST6A-C) .....                                                                                                                                           | S14 |
| <sup>13</sup> C-NMR (NST6A-D) .....                                                                                                                                           | S14 |
| LC-ESI-MS(-) (NST001A) .....                                                                                                                                                  | S15 |
| LC-ESI-MS(-) (NST001B) .....                                                                                                                                                  | S15 |
| LC-ESI-MS(-) (NST6A-A) .....                                                                                                                                                  | S16 |
| LC-ESI-MS(-) (NST6A-B) .....                                                                                                                                                  | S16 |
| LC-ESI-MS(-) (NST6A-C) .....                                                                                                                                                  | S17 |
| LC-ESI-MS(-) (NST6A-D) .....                                                                                                                                                  | S17 |
| HPLC purity (NST001) .....                                                                                                                                                    | S18 |
| HPLC purity (NST001A) .....                                                                                                                                                   | S19 |
| HPLC purity (NST001B) .....                                                                                                                                                   | S20 |
| HPLC purity (NST6A-A) .....                                                                                                                                                   | S21 |
| HPLC purity (NST6A-B) .....                                                                                                                                                   | S22 |
| HPLC purity (NST6A-C) .....                                                                                                                                                   | S23 |
| HPLC purity (NST6A-D) .....                                                                                                                                                   | S24 |

**Figure S1.** IC<sub>50</sub> values (µg/mL) of celastrol and 1 analogues on BGC823.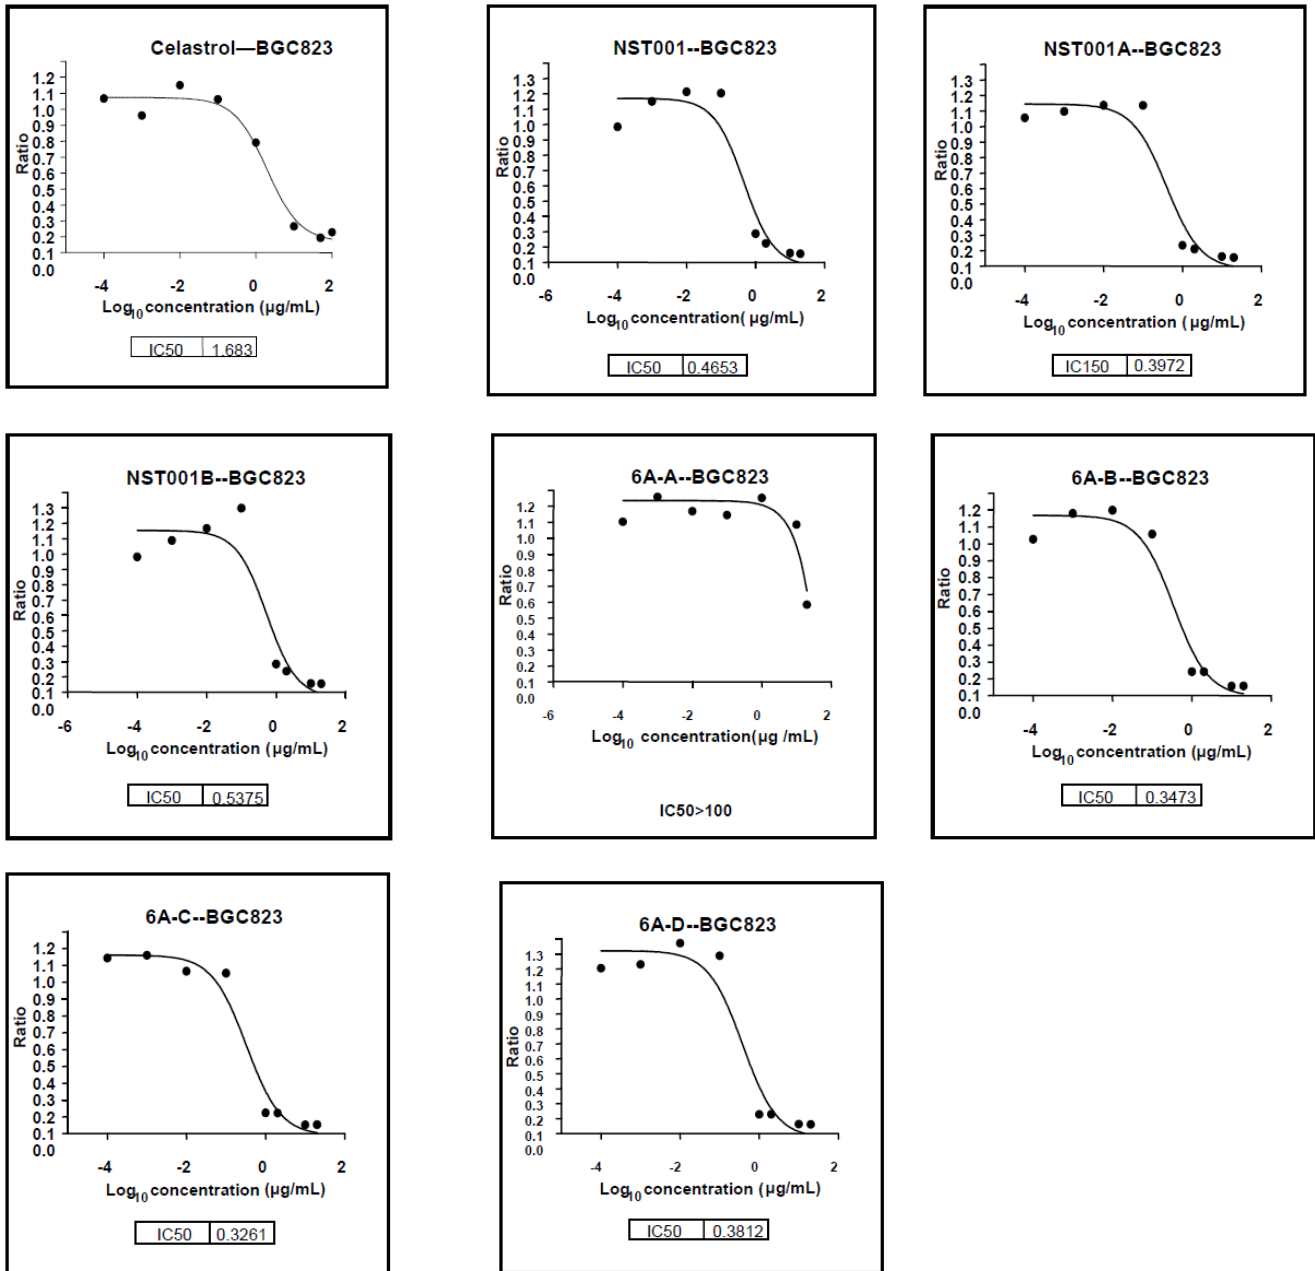

**Figure S2.** IC<sub>50</sub> values (µg/mL) of celastrol and 1 analogues on H4.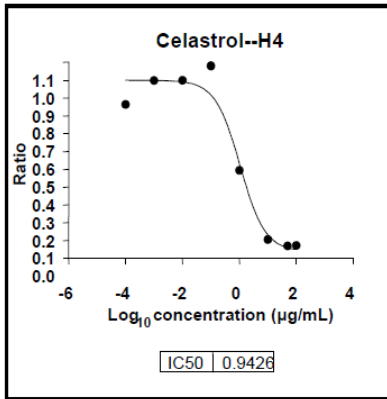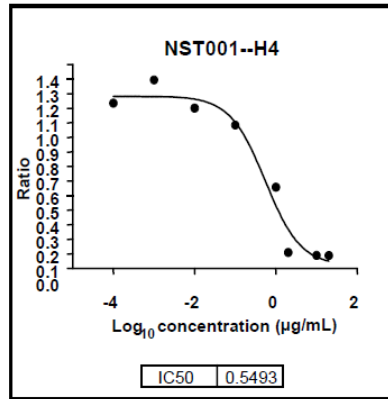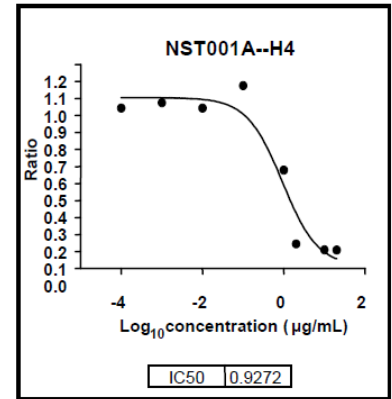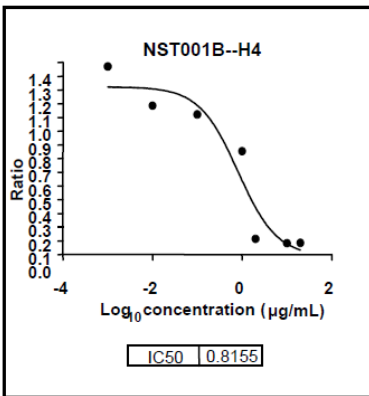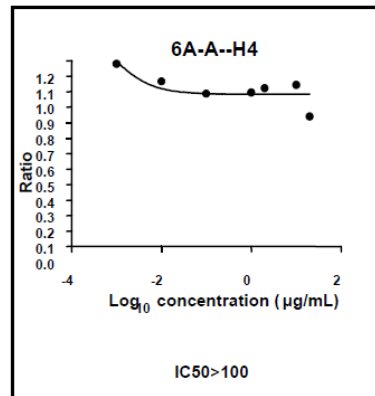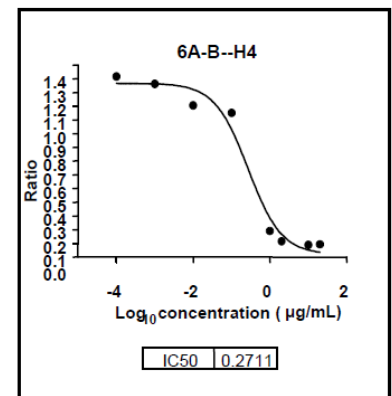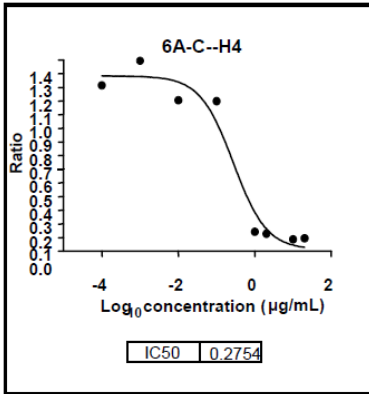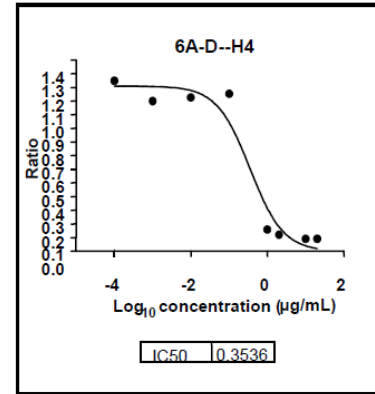

**Figure S3.** IC<sub>50</sub> values (µg/mL) of celastrol and 1 analogues on Bel7402.

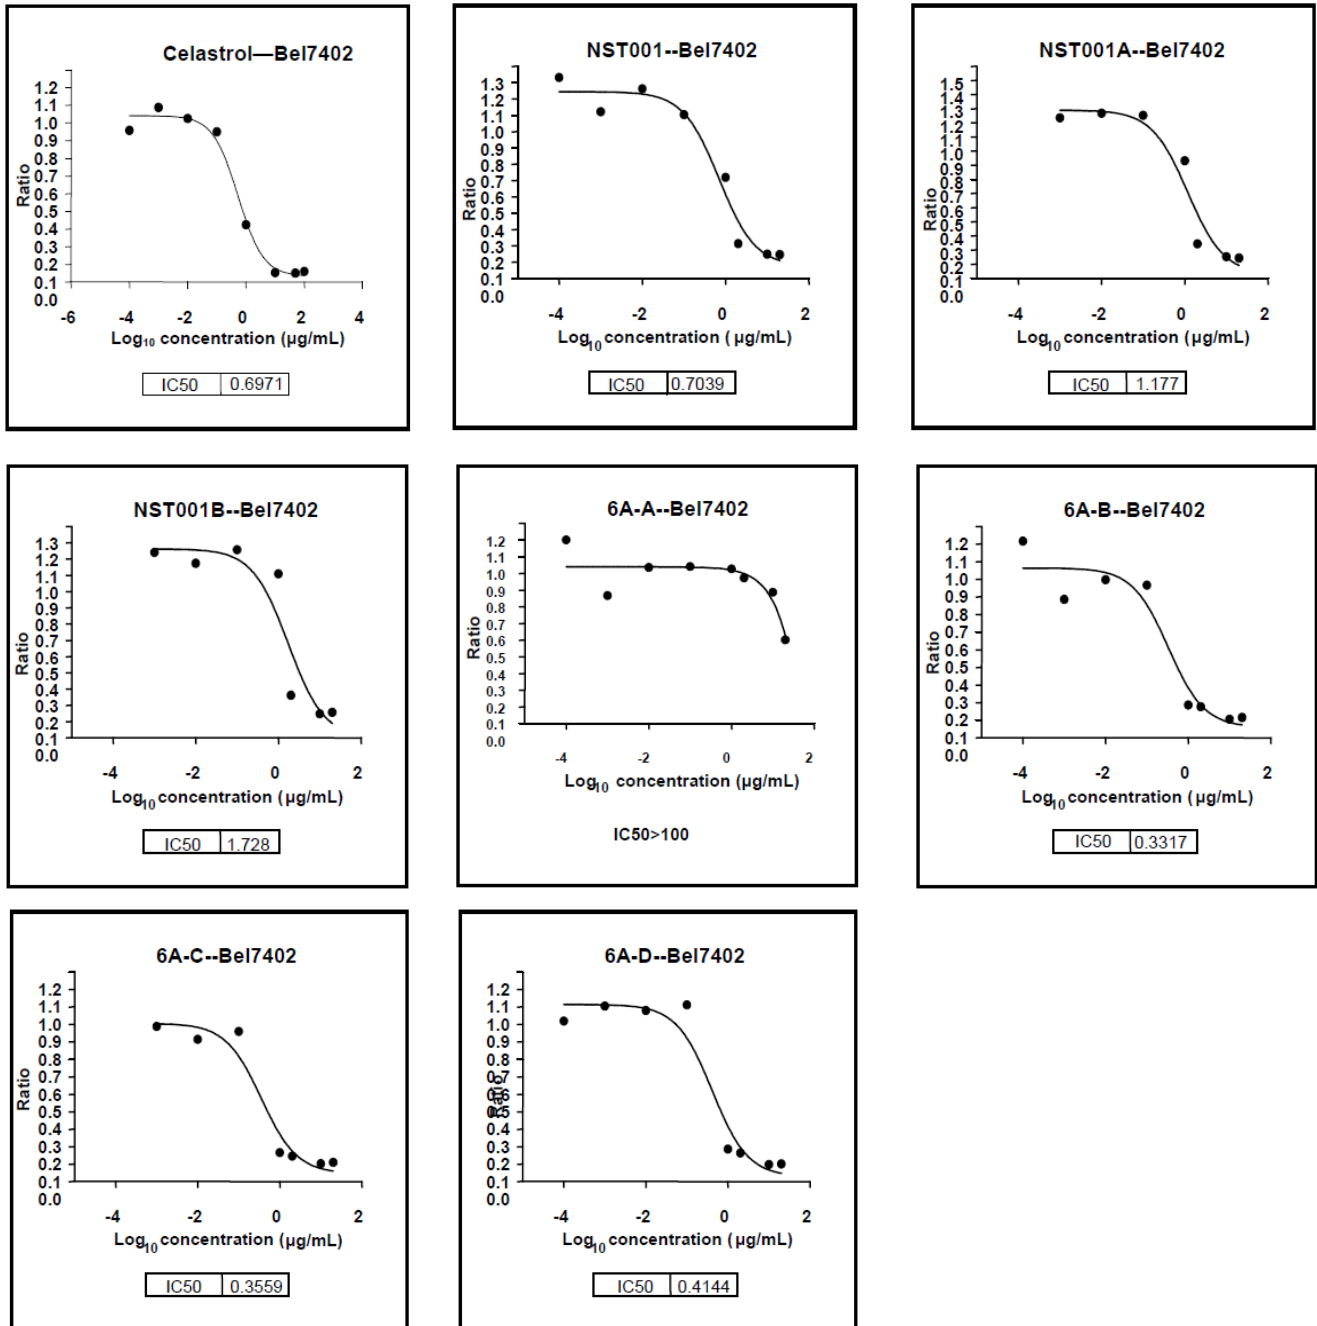

**Figure S4.** IC<sub>50</sub> values (μg/mL) of NST001A on human cancer cell lines.

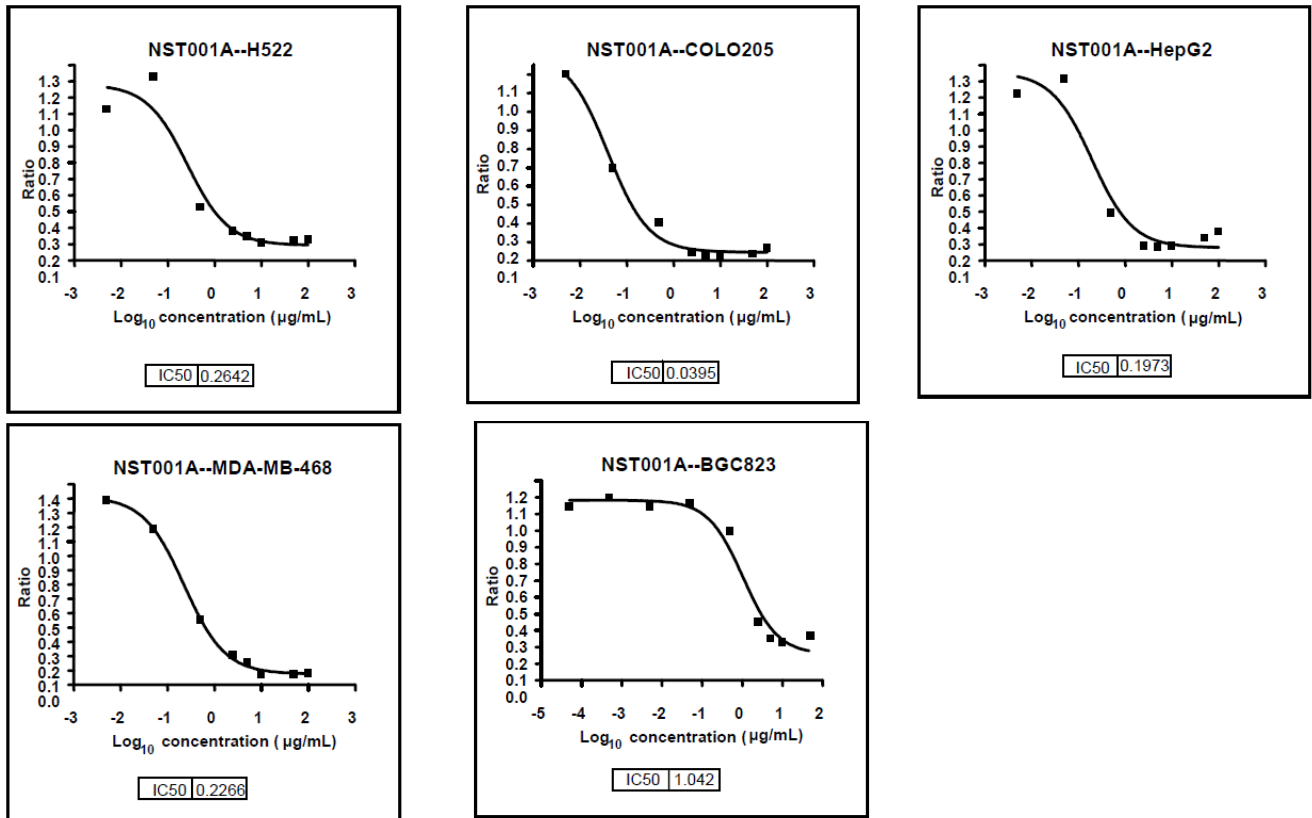

**Figure S5.** IC<sub>50</sub> values (μg/mL) of NST001 on human cancer cell lines.

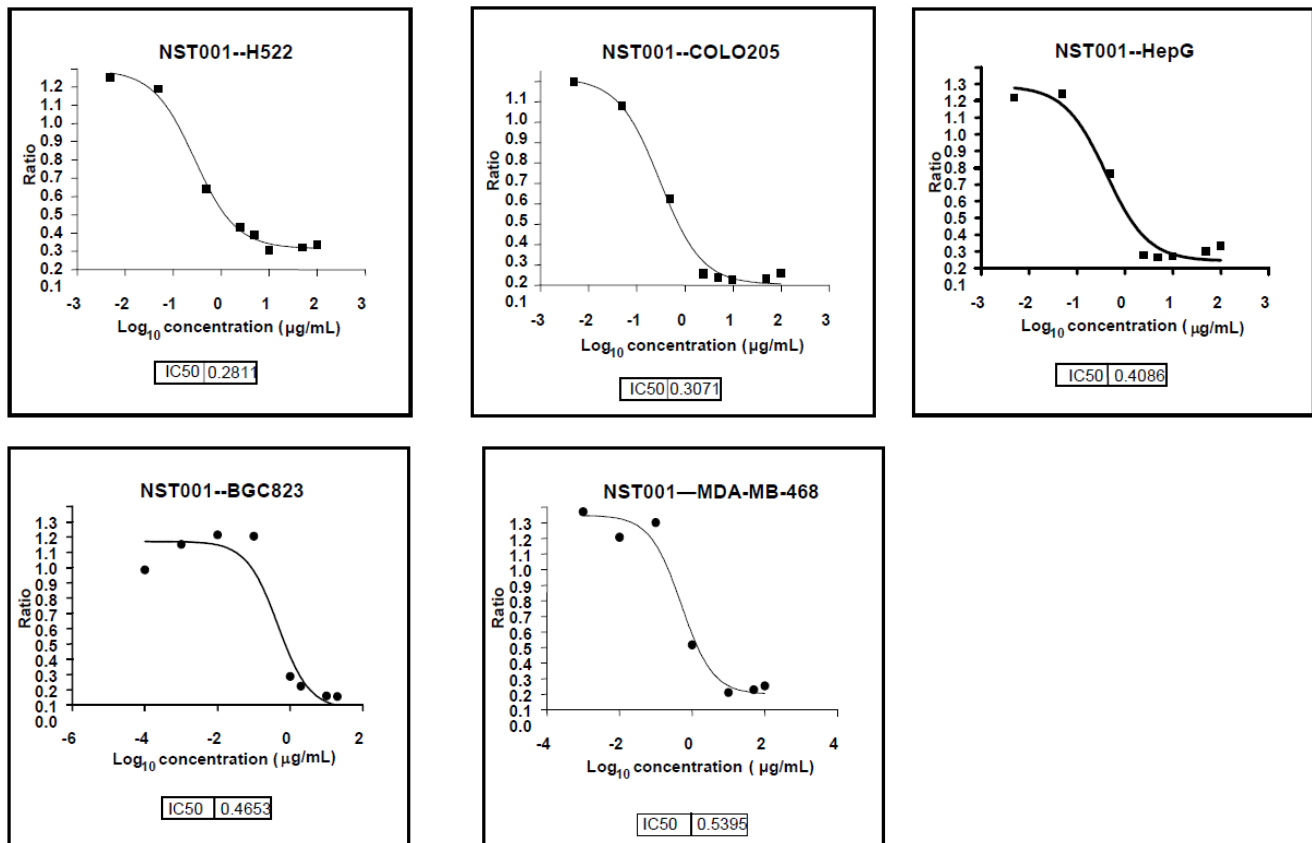

The  $IC_{50}$  values ( $\mu M$ ) in the article was calculated according to the following formula:  $IC_{50} (\mu M) = IC_{50} (\mu g/mL) / Mw \times 1000$ , the molecular weight (Mw) was list in the table.

**Table S1.** The Mw of the Compounds (g/mol).

| NST    | NST001 | NST001B | NST001A | NST-6A-B | NST-6A-C | NST-6A-D |
|--------|--------|---------|---------|----------|----------|----------|
| 450.61 | 603.67 | 726.7   | 678.83  | 733.87   | 778.09   | 764.06   |

**Figure S6.** The inhibitory rate (at concentrations of 0.1, 10  $\mu g/mL$  for 72 h) on Colo 205 growth. The results are expressed as the percentage of that of the treat cells.

|                | NST-6A-A | NST-6A-B | NST-6A-C | NST-6A-D | NST001A | NST001B | NST001 | NST    |
|----------------|----------|----------|----------|----------|---------|---------|--------|--------|
| 10 $\mu g/mL$  | 66.51%   | 93.24%   | 92.50%   | 93.16%   | 93.32%  | 93.27%  | 92.34% | 87.54% |
| 0.1 $\mu g/mL$ | 70.26%   | 72.52%   | 44.55%   | 66.35%   | 76.12%  | 72.29%  | 75.45% | 66.65% |

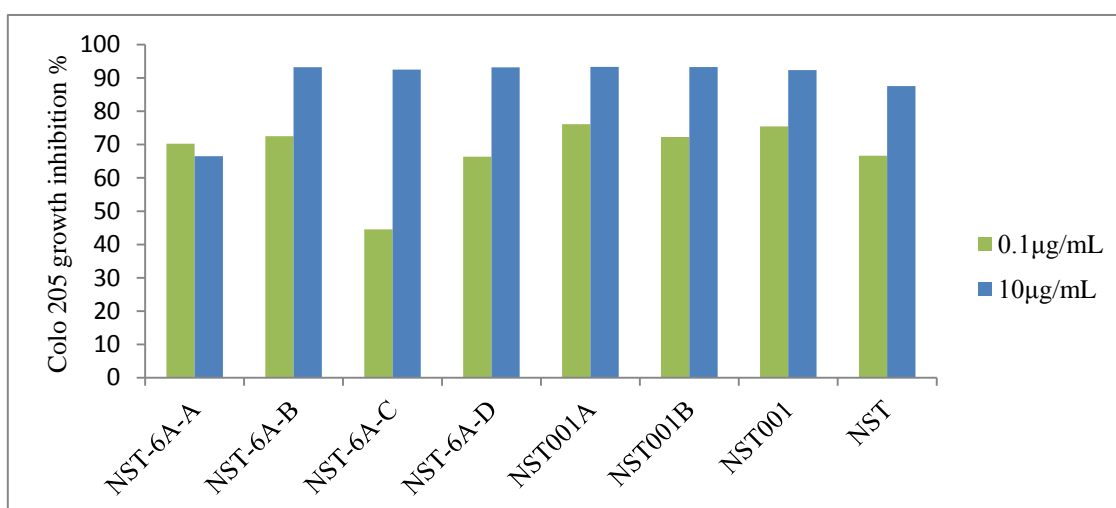

As **NST001** and **NST001A** showed most potent inhibition at both concentrations, these two compounds were selected to identify precise  $IC_{50}$  values on human non-small cell lung cell line H522, human colon cancer cell line Colo 205, human hepatocellular liver carcinoma cell line HepG2, human breast adenocarcinoma cell line MDA-MB-468 and human gastric cancer cell line BGC823. As shown in Figure S4, **NST001A** was more sensitive to all human cancer cells, especially Colo 205 cell. Therefore, **NST001A** was selected to conduct further *in vivo* assays.

A possible reaction mechanism for the synthesis of the intermediate compounds NST001 and NST6A~D was outlined in Scheme S1.

**Scheme S1.** Synthetic scheme of the designed compounds.

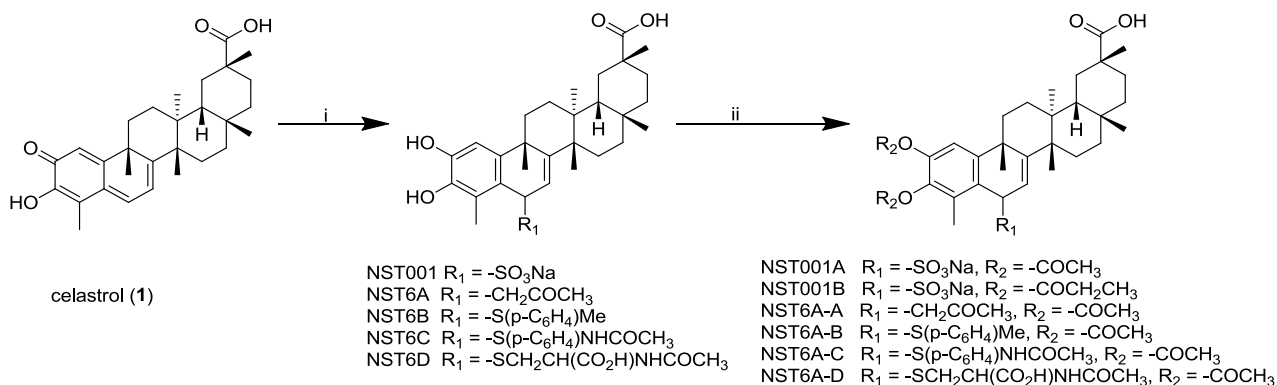

*Reagents and conditions:* (i) For **NST001**: NaHSO<sub>3</sub>, MeOH, RT, 1.5 h, N<sub>2</sub>; For **NST6A**: acetone, 1 N HCl (cat.), RT, N<sub>2</sub>; For **NST6A~D**: RSH, MeOH, RT, N<sub>2</sub>; (ii) Ac<sub>2</sub>O, Py, RT, N<sub>2</sub>; or (CH<sub>3</sub>CH<sub>2</sub>CO)<sub>2</sub>O, Py, RT, N<sub>2</sub>.

Possible mechanism of the synthesis of NST001 and NST6A~D:

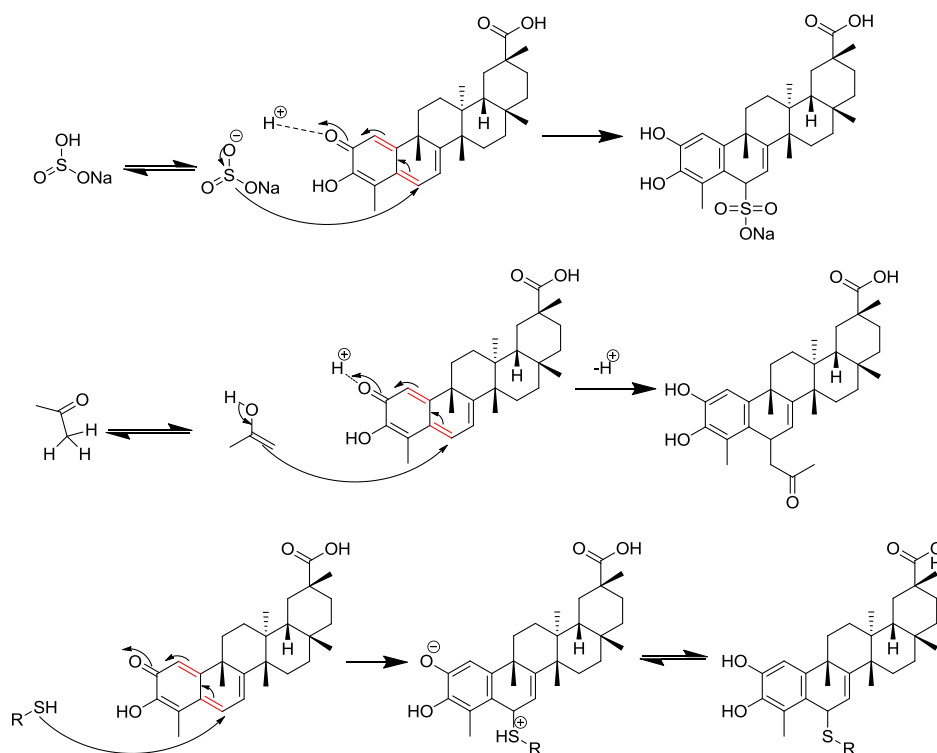

**Table S2.** The change of the mice body weight and the inhibitory rate of tumor(T/C) of different drug loaded system against Colo 205 tumor in nude mice (mean ±SD).

| Group              | N.O. of Mice |       | Body Weight (g) |                 | Tumor Volume (TV, mm <sup>3</sup> ) |                   | T/C/% | Tumor Weight (g) | IRT/% |
|--------------------|--------------|-------|-----------------|-----------------|-------------------------------------|-------------------|-------|------------------|-------|
|                    | Initial      | Final | Initial         | Final           | Initial                             | Final             |       |                  |       |
| model              | 12           | 12    | 20.50 ±1.45     | 19.83 ±2.08     | 118.13 ±36.46                       | 1528.59 ±415.00   | --    | 0.99 ±0.25       | --    |
| Cisplatin (4mg/kg) | 7            | 7     | 20.71 ±1.50     | 15.57 ±1.40 *** | 122.11 ±47.85                       | 793.58 ±379.56 ** | 49.32 | 0.45 ±0.25 ***   | 55.00 |
| NST001A (6mg/kg)   | 6            | 6     | 20.33 ±1.03     | 18.83 ±2.79     | 119.97 ±27.66                       | 910.83 ±301.60 ** | 56.75 | 0.55 ±0.23 **    | 44.66 |
| NST001A (12mg/kg)  | 6            | 6     | 21.33 ±0.82     | 18.00 ±2.19     | 114.01 ±26.15                       | 1104.71 ±494.57   | 77.25 | 0.68 ±0.35 *     | 31.82 |
| NST001A (24mg/kg)  | 6            | 6     | 21.33 ±0.52     | 18.33 ±1.21     | 118.05 ±39.37                       | 818.65 ±162.53 ** | 54.00 | 0.49 ±0.09 ***   | 50.96 |

All data are means ±SD. --: Not detect, \*  $p < 0.05$ , \*\*  $p < 0.01$ , \*\*\*  $p < 0.001$  when compared with model.

**Figure S7.** Effects of NST001A on the growth of Colo 205 xenografts in nude mice.

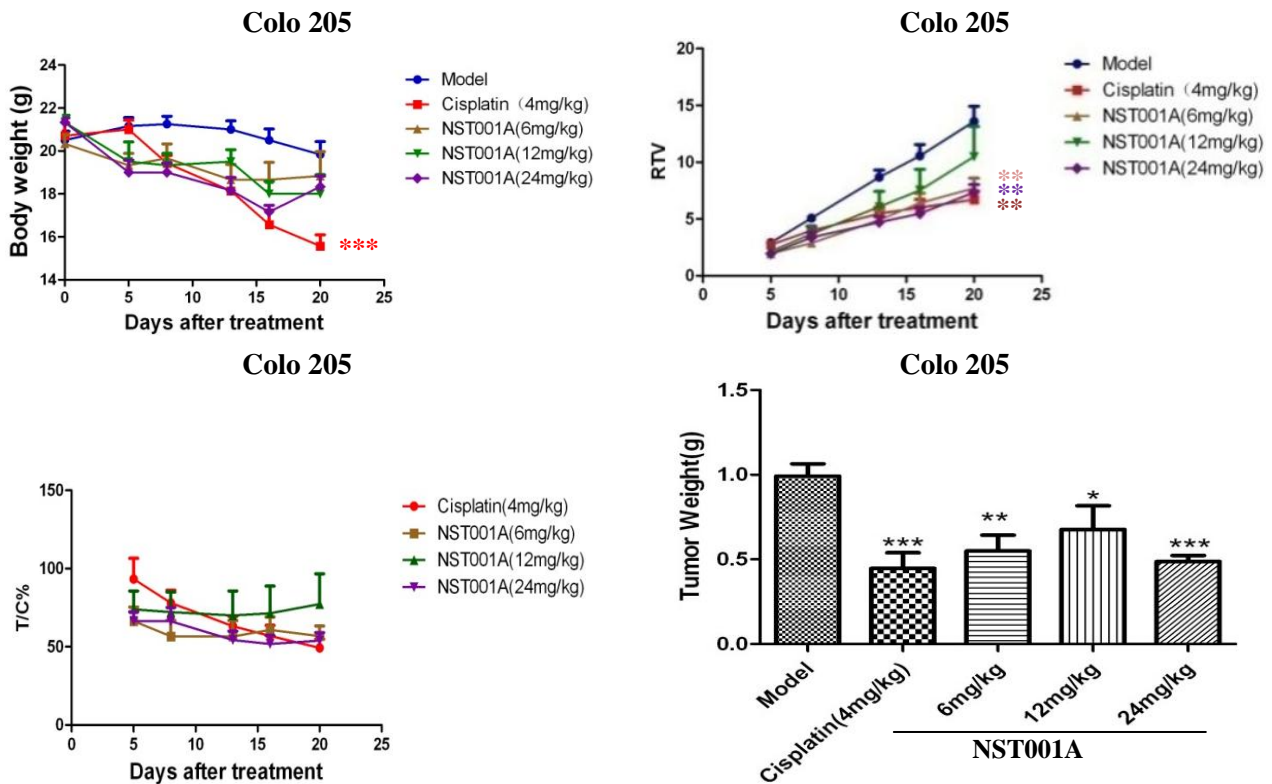

All data are means ±SD. \*  $p < 0.05$ , \*\*  $p < 0.01$ , \*\*\*  $p < 0.001$  when compared with model.



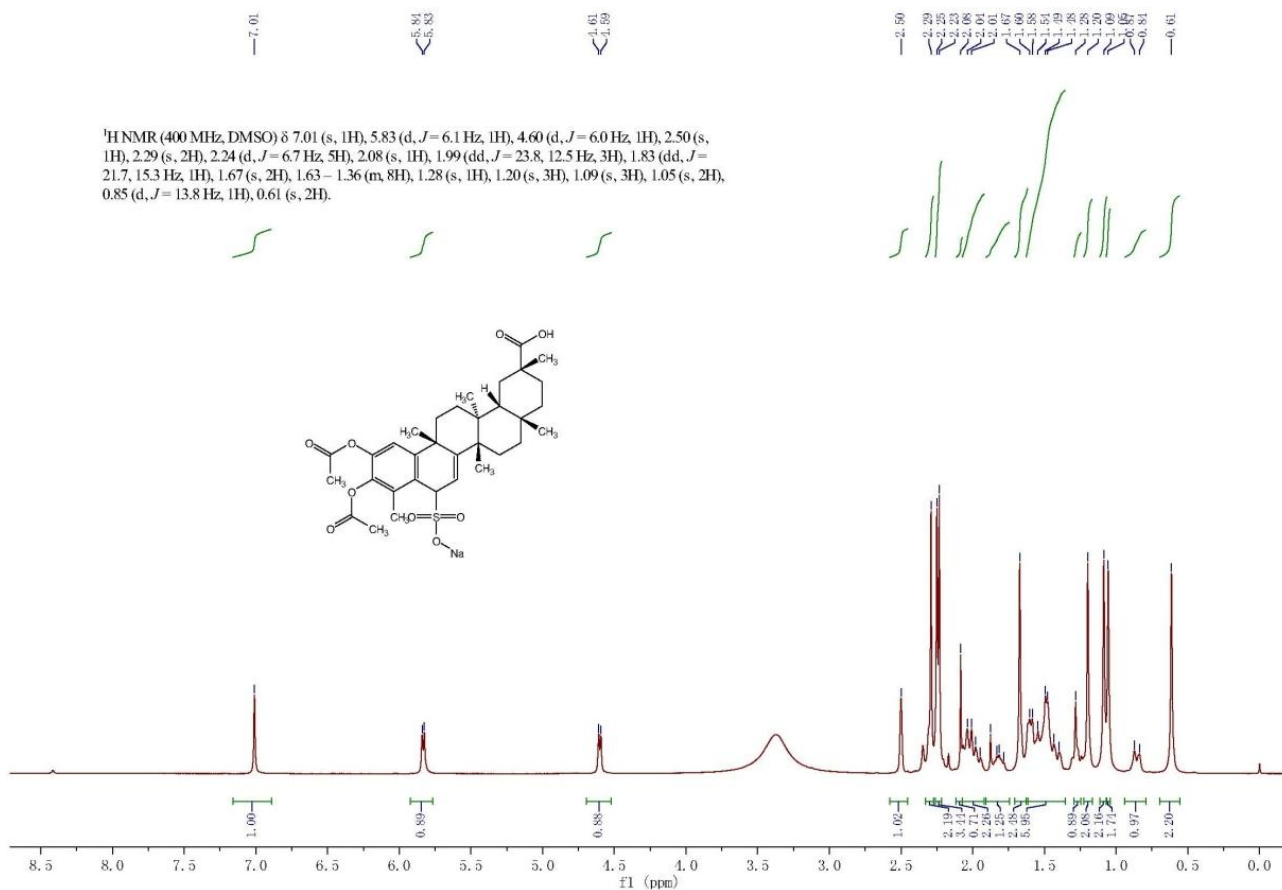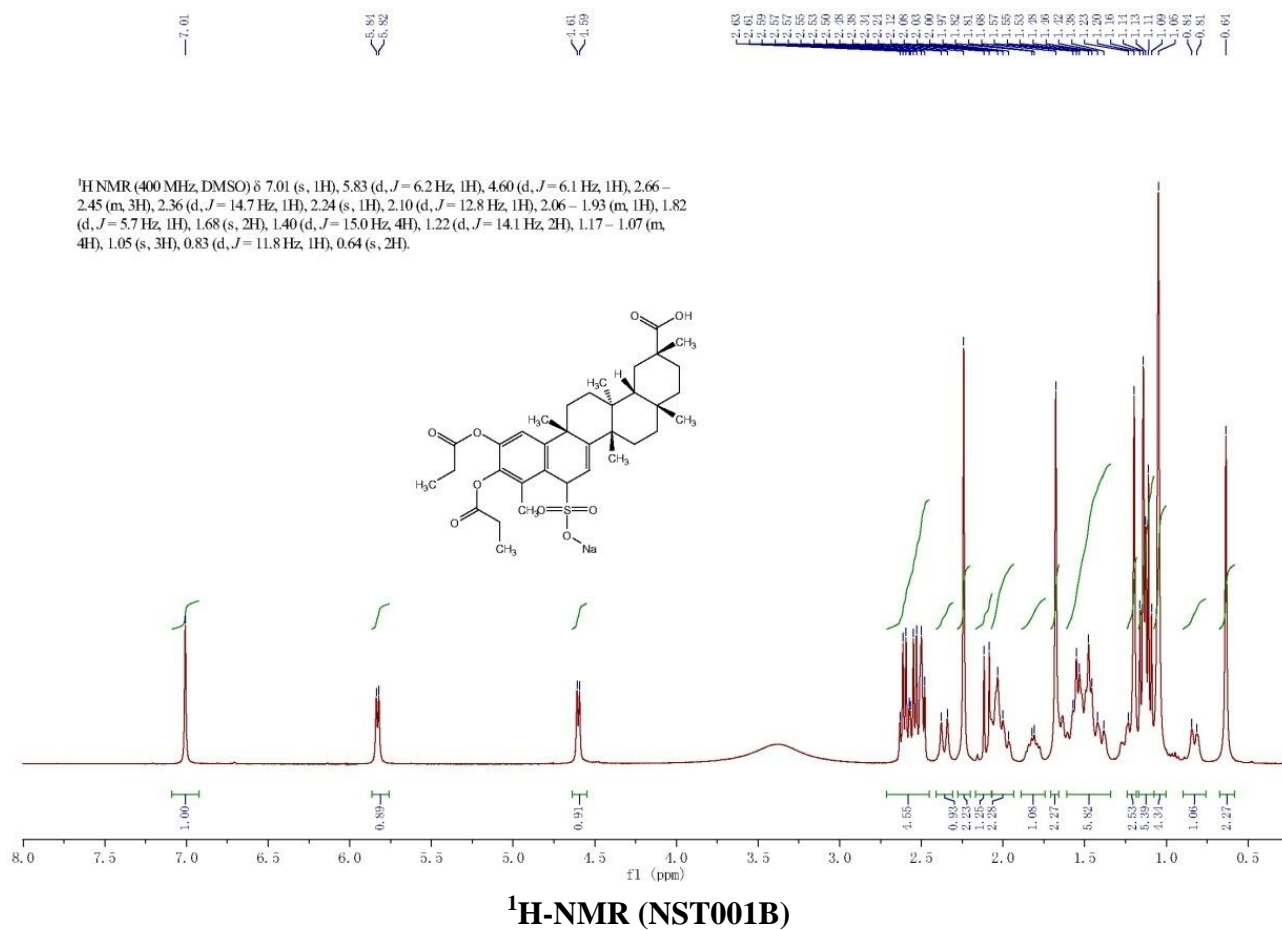

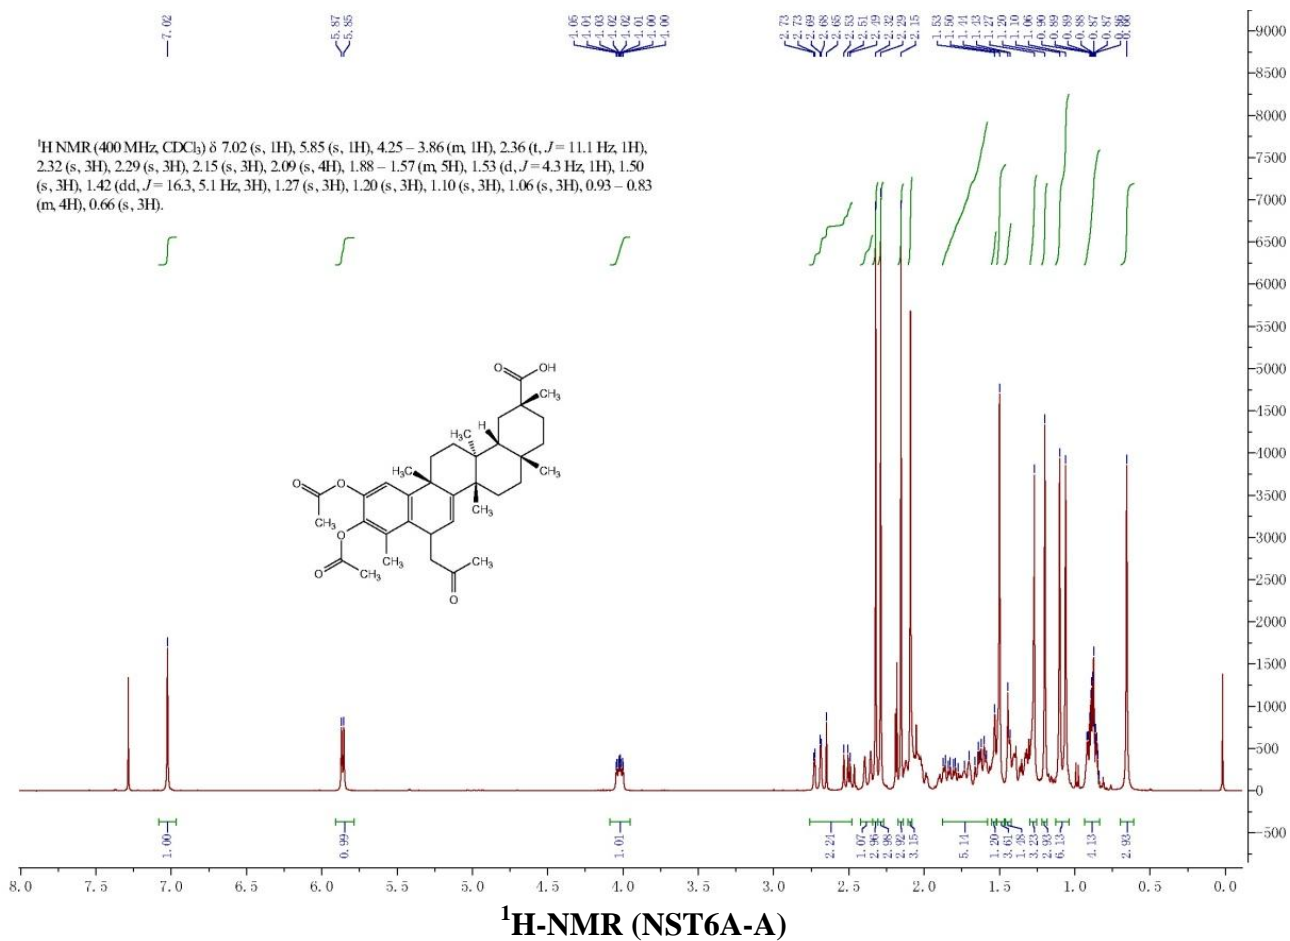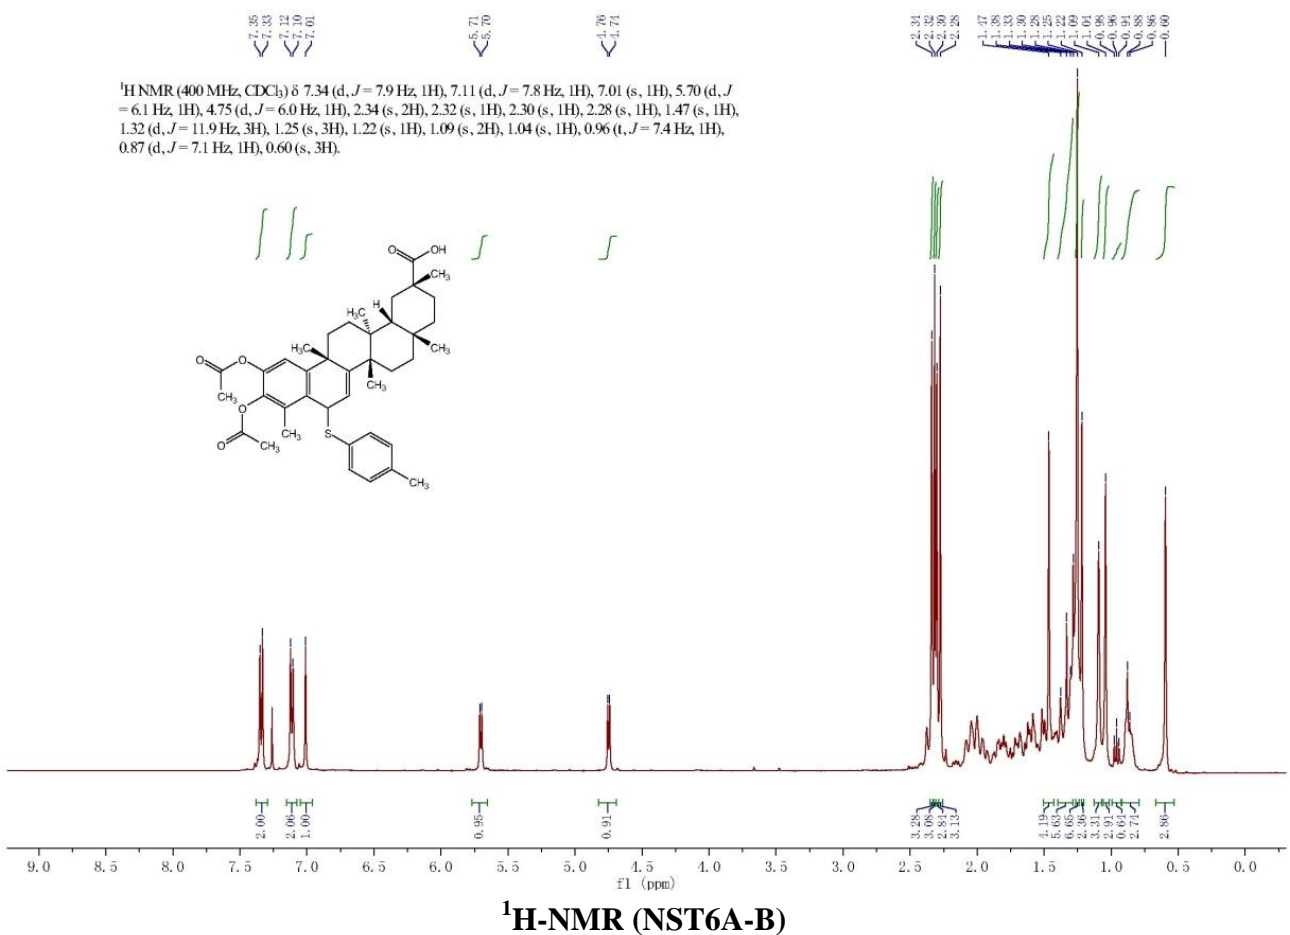

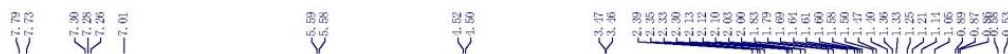

$^1\text{H-NMR}$  (400 MHz,  $\text{CDCl}_3$ )  $\delta$  7.76 (d,  $J=22.2$  Hz, 1H), 7.37 – 7.21 (m, 4H), 7.01 (s, 1H), 5.59 (d,  $J=6.1$  Hz, 1H), 4.51 (d,  $J=6.0$  Hz, 1H), 3.47 (d,  $J=2.9$  Hz, 1H), 2.39 (s, 1H), 2.34 (d,  $J=7.0$  Hz, 7H), 2.30 (s, 3H), 2.12 (t,  $J=7.4$  Hz, 4H), 2.02 (d,  $J=13.1$  Hz, 2H), 1.88 – 1.54 (m, 6H), 1.50 (s, 1H), 1.47 (s, 3H), 1.43 – 1.29 (m, 4H), 1.25 (s, 2H), 1.21 (s, 3H), 1.14 (s, 3H), 1.05 (s, 3H), 0.94 – 0.82 (m, 1H), 0.53 (s, 3H).

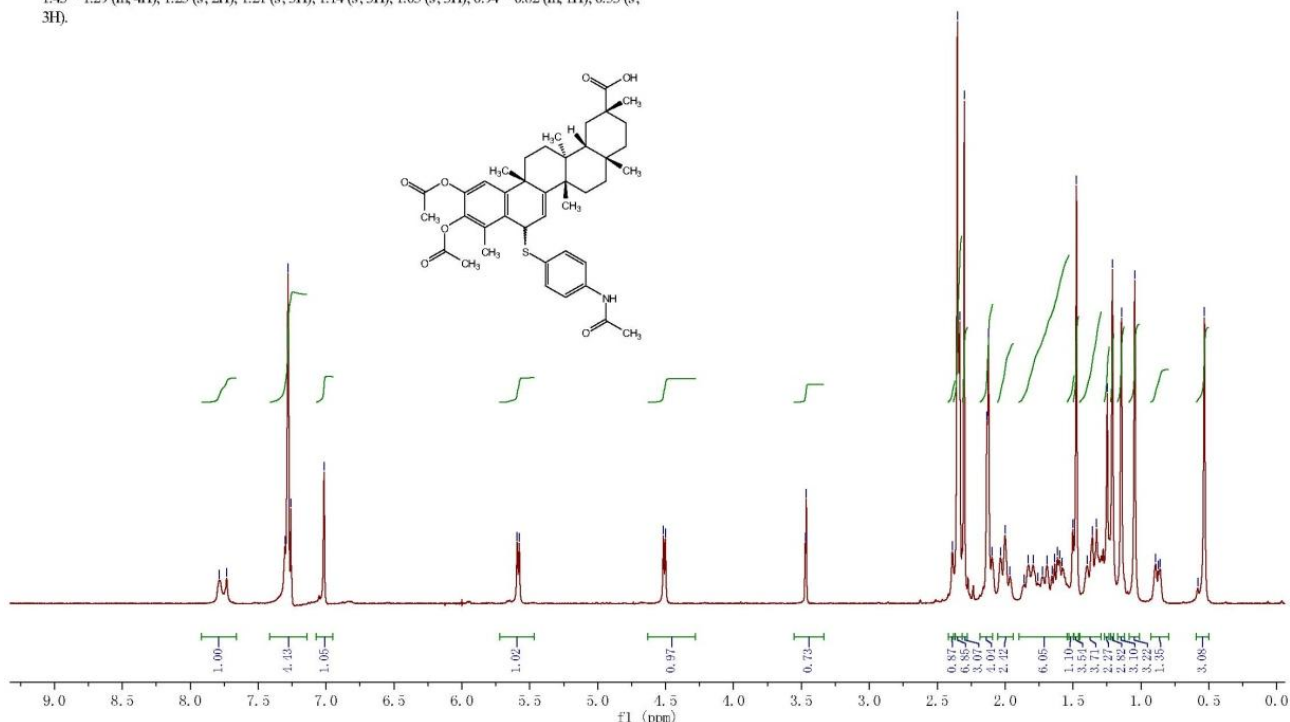

$^1\text{H-NMR}$  (NST6A-C)

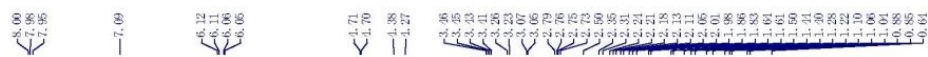

$^1\text{H-NMR}$  (400 MHz, DMSO)  $\delta$  8.14 – 7.78 (m, 1H), 7.09 (s, 1H), 6.09 (dd,  $J=24.2, 5.7$  Hz, 1H), 4.71 (d,  $J=5.4$  Hz, 1H), 4.38 (s, 1H), 4.27 (s, 1H), 3.56 – 3.53 (m, 1H), 3.44 (dd,  $J=13.8, 6.9$  Hz, 1H), 3.24 (d,  $J=9.5$  Hz, 1H), 3.06 (d,  $J=5.5$  Hz, 1H), 2.76 (dd,  $J=13.3, 8.2$  Hz, 1H), 2.50 (s, 1H), 2.33 (d,  $J=16.1$  Hz, 2H), 2.24 (s, 1H), 2.19 (d,  $J=9.8$  Hz, 1H), 2.16 – 1.92 (m, 2H), 1.86 (s, 1H), 1.83 (s, 1H), 1.63 (d,  $J=9.2$  Hz, 2H), 1.55 – 1.36 (m, 3H), 1.25 (d,  $J=24.4$  Hz, 3H), 1.10 (s, 2H), 1.05 (d,  $J=9.1$  Hz, 2H), 0.87 (d,  $J=11.2$  Hz, 1H), 0.64 (s, 2H).

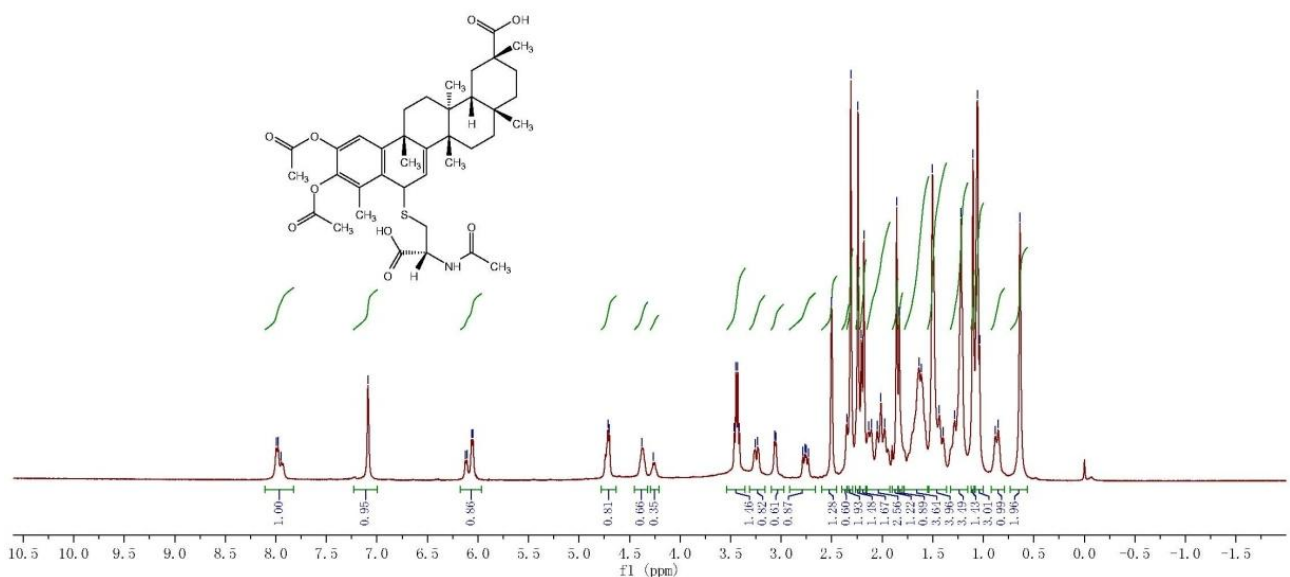

$^1\text{H-NMR}$  (NST6A-D)



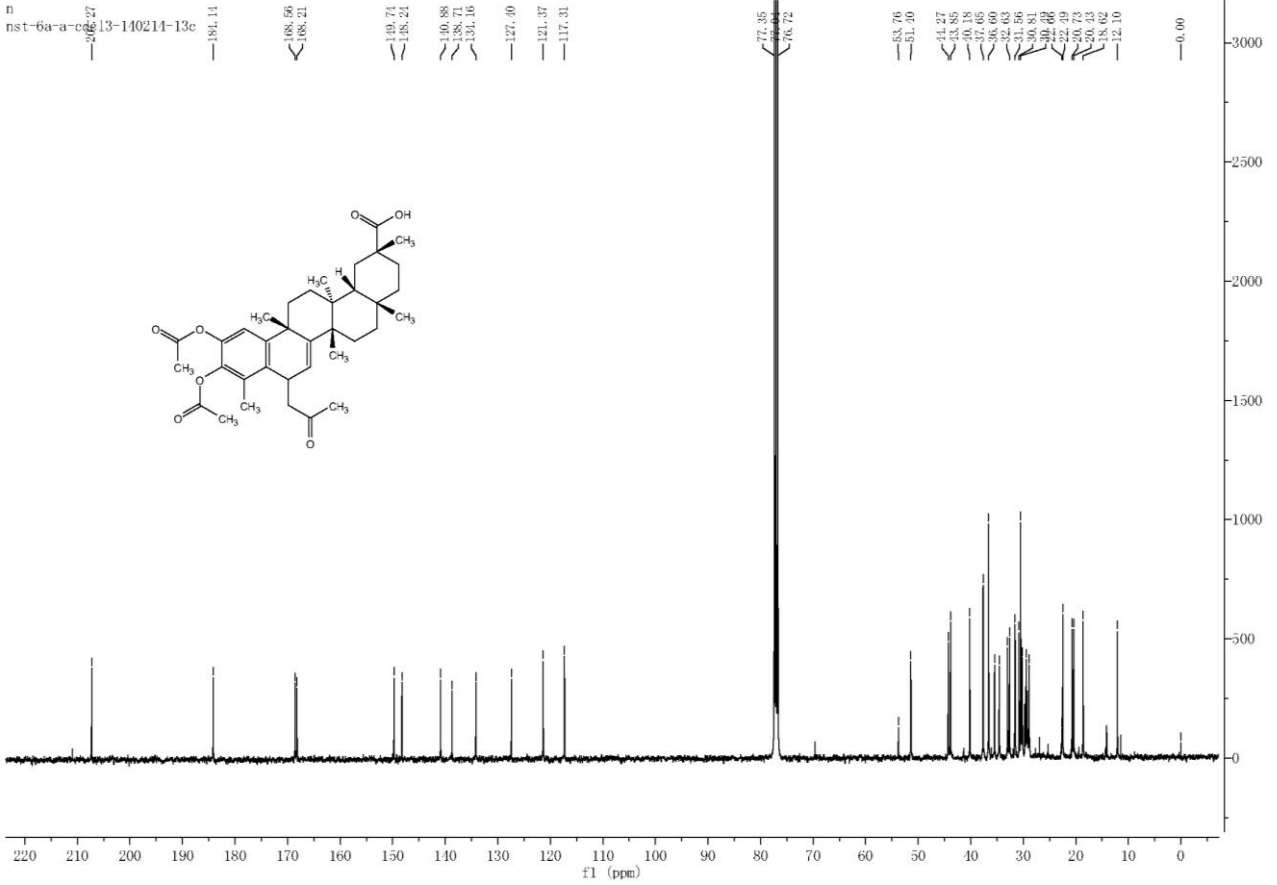

<sup>13</sup>C-NMR (NST6A-A)

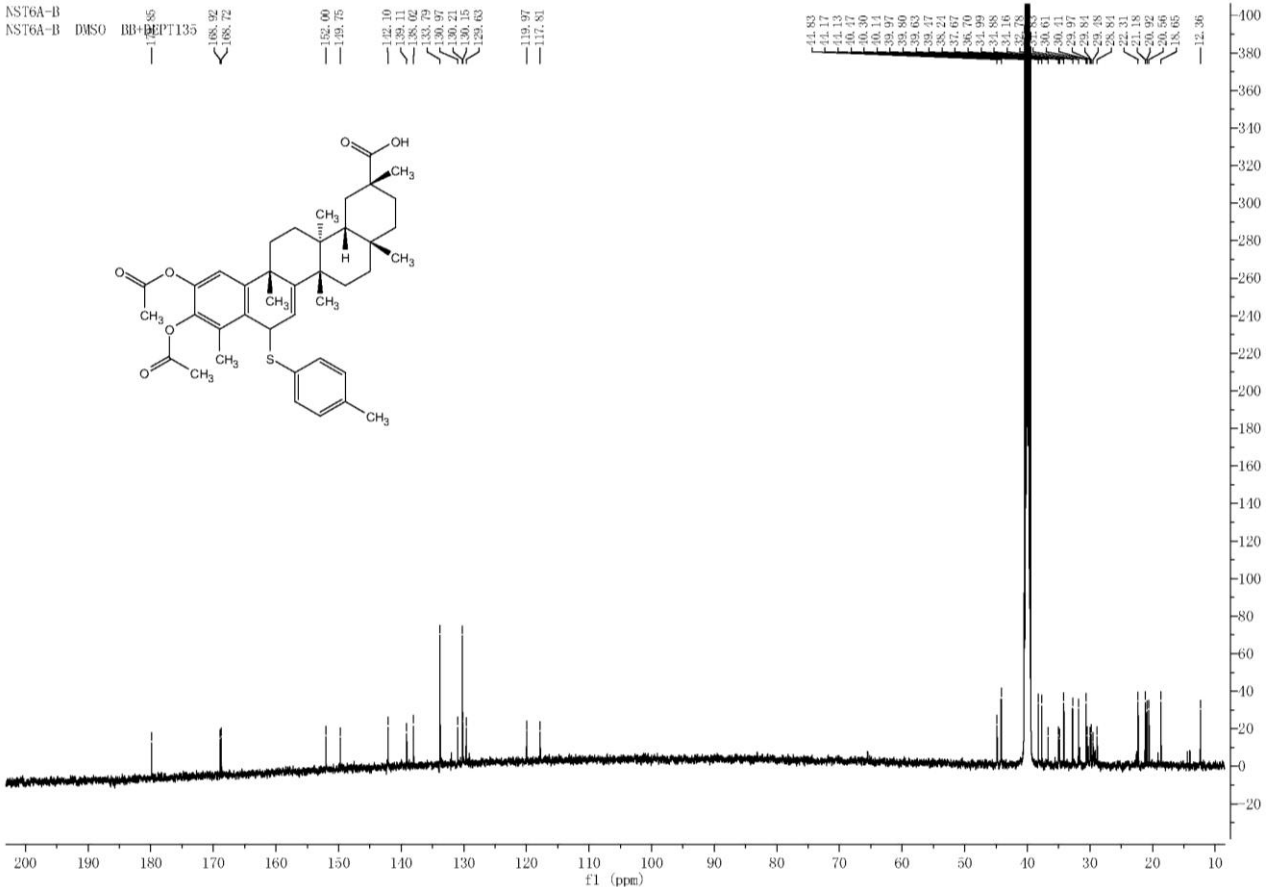

<sup>13</sup>C-NMR (NST6A-B)

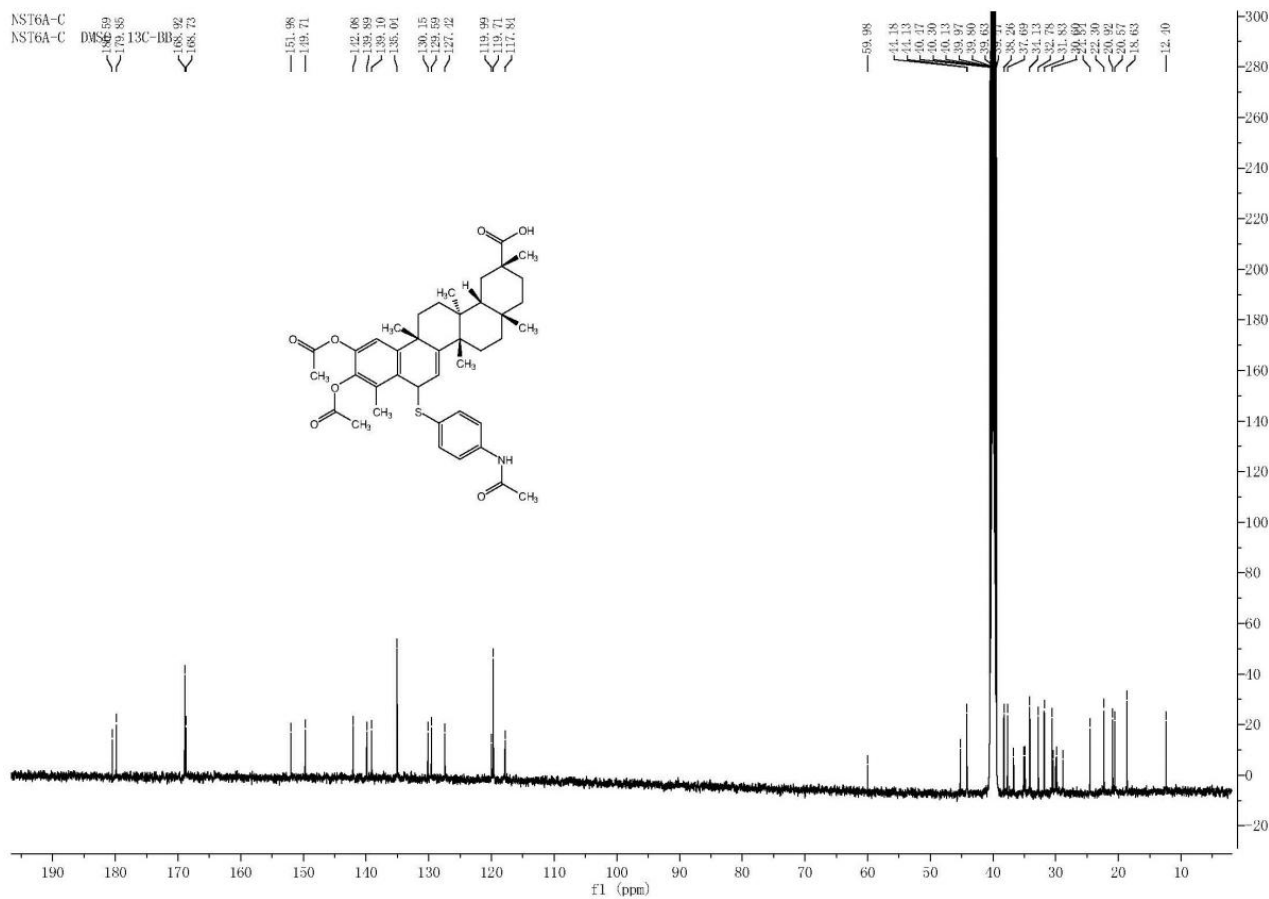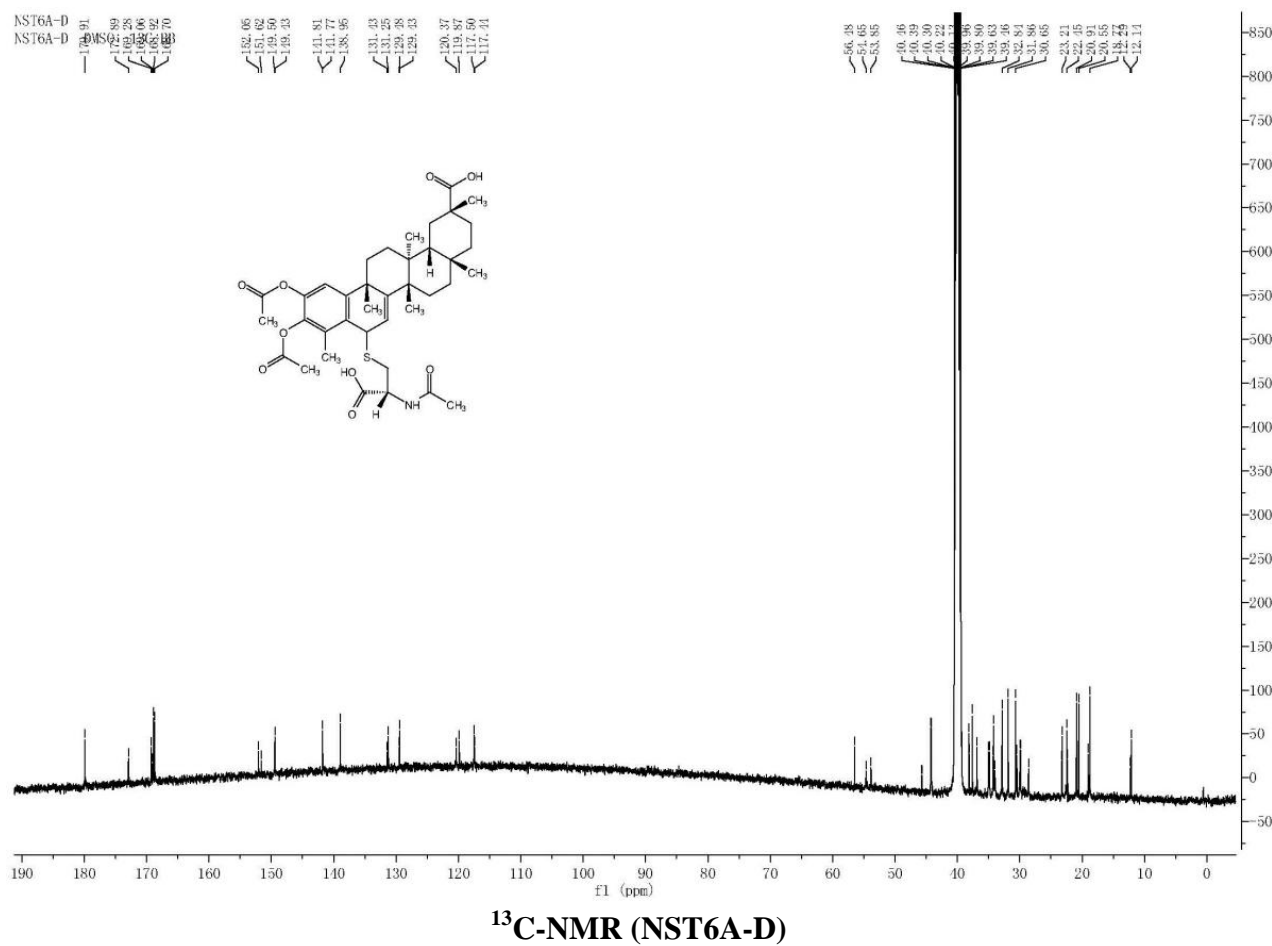

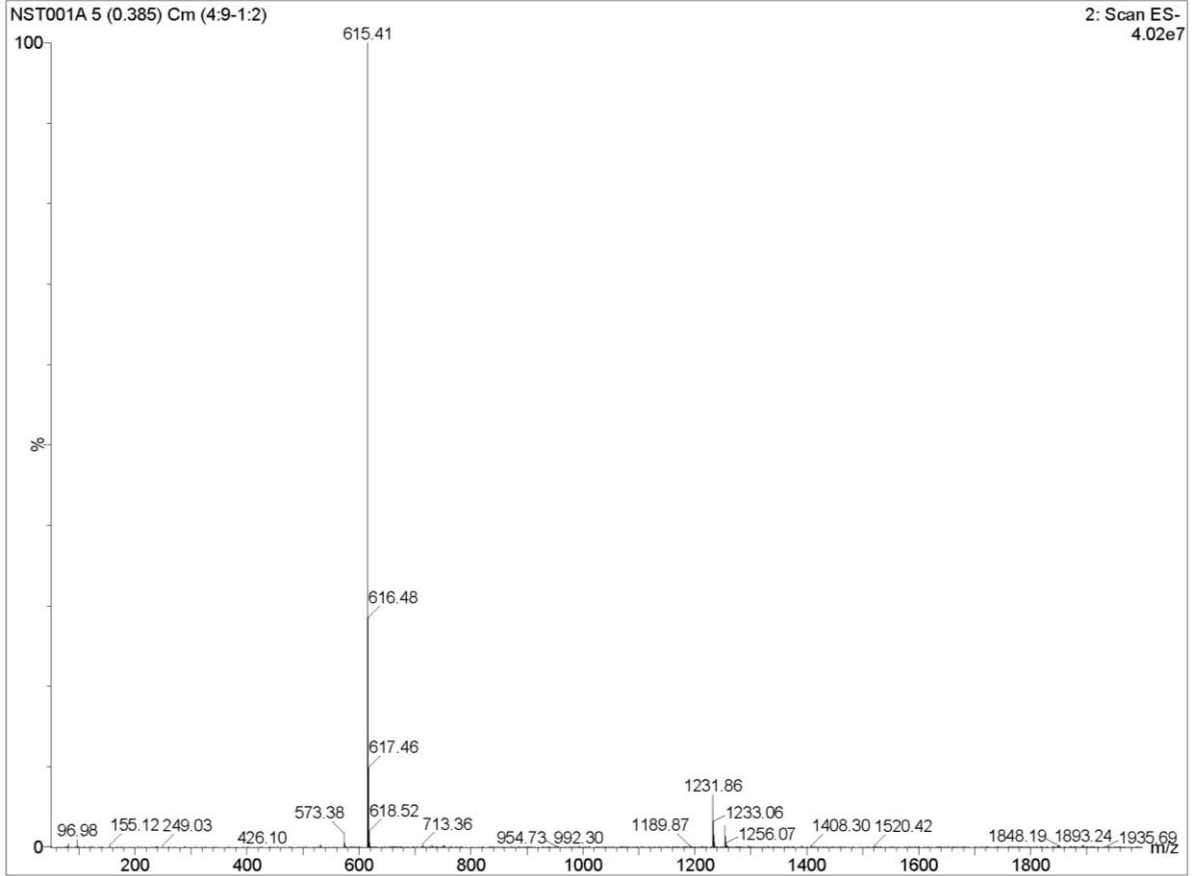

LC-ESI-MS(-) (NST001A)

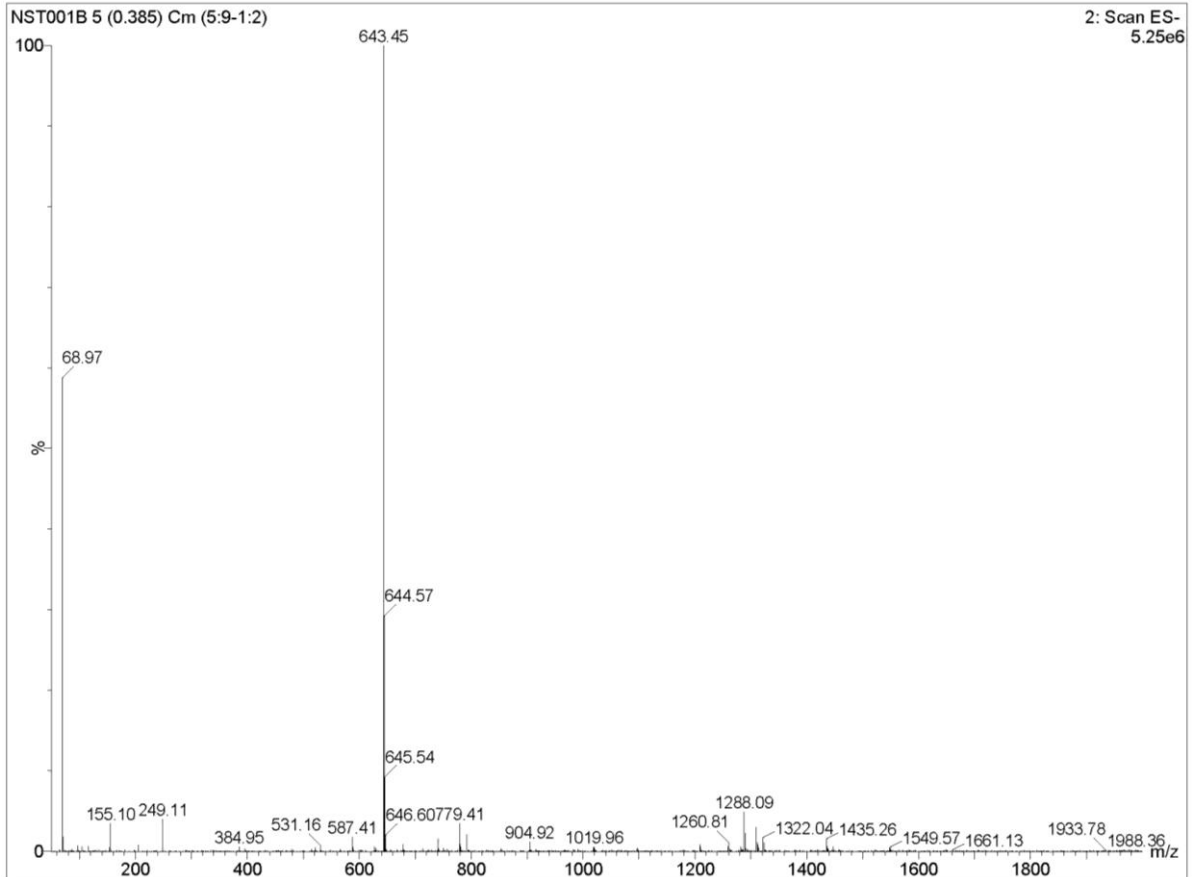

LC-ESI-MS(-) (NST001B)

D:\YYE PROJECT\...NST-6A-A\_121016122927

10/16/2012 12:29:27 PM

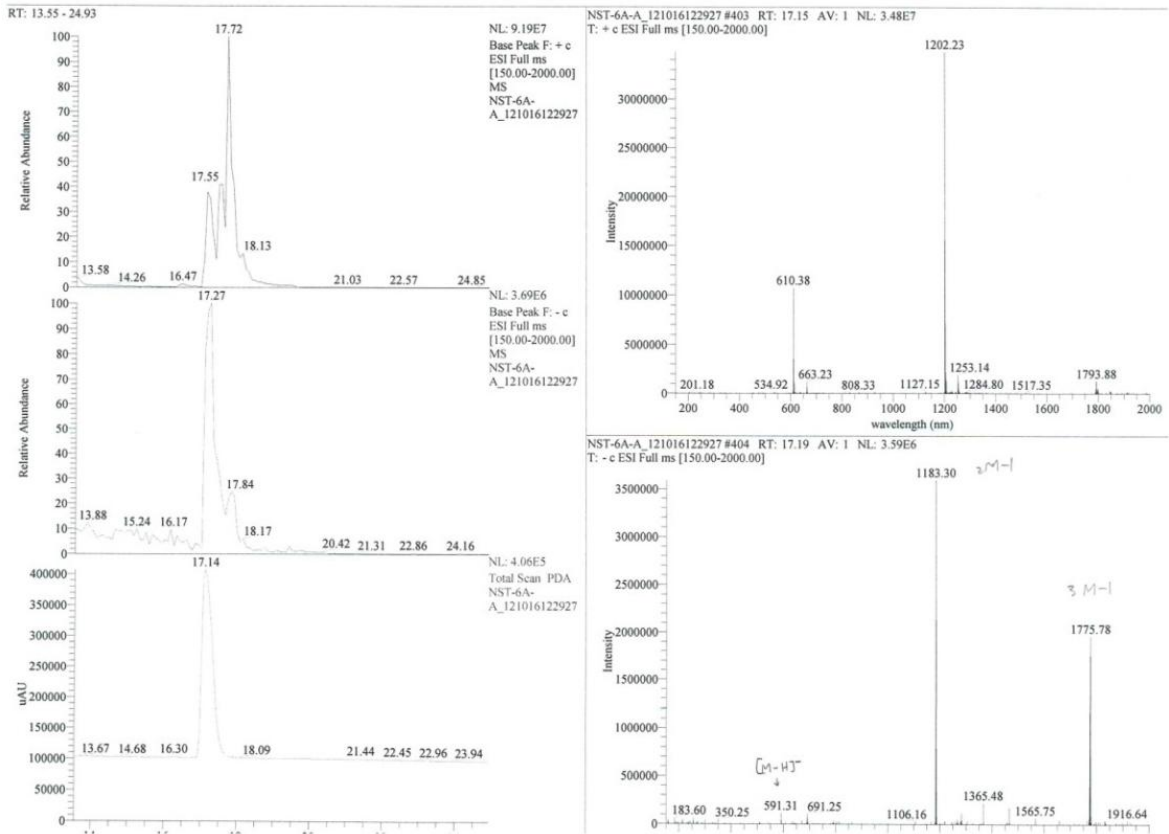

LC-ESI-MS(-) (NST6A-A)

D:\YYE PROJECT\...NST-6A-B\_121017102055

10/17/2012 10:20:55 AM

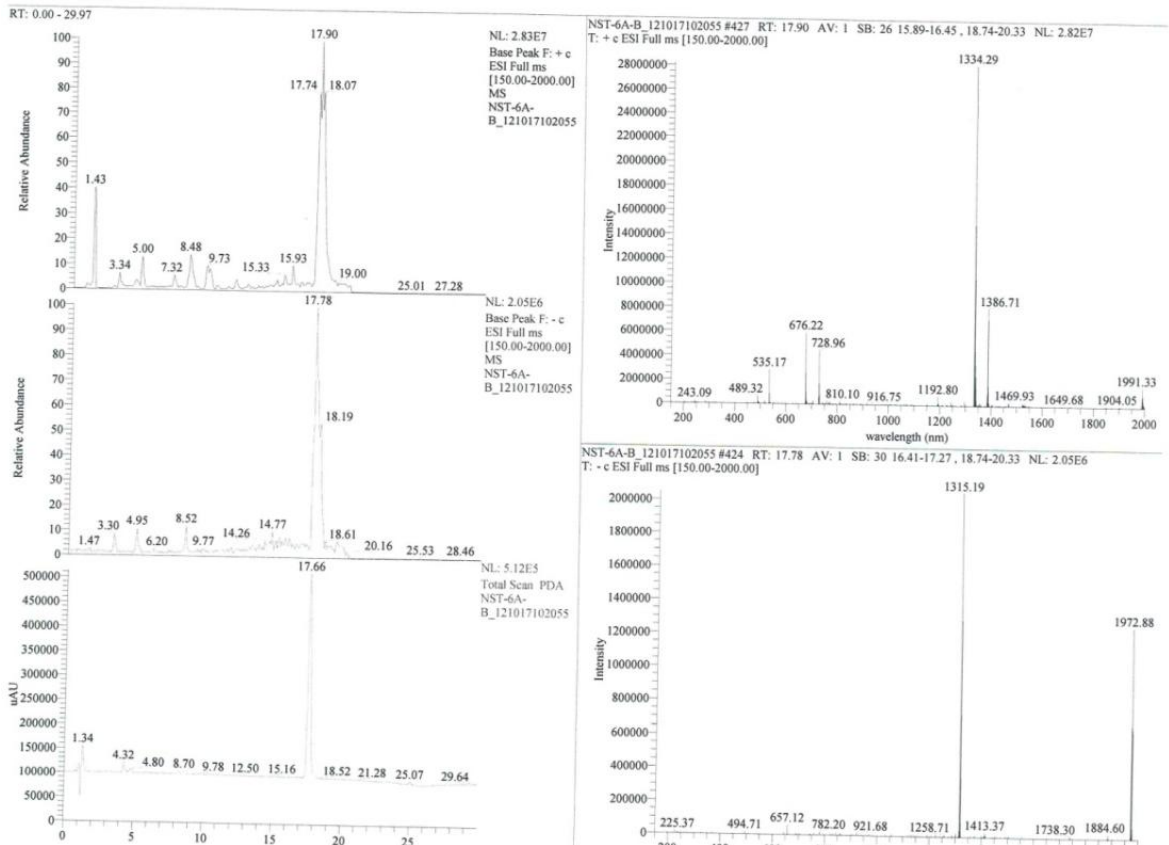

LC-ESI-MS(-) (NST6A-B)



LENY YE PROJECTIONS\_NST-6A-C\_121016135444

10/16/2012 1:54:44 PM

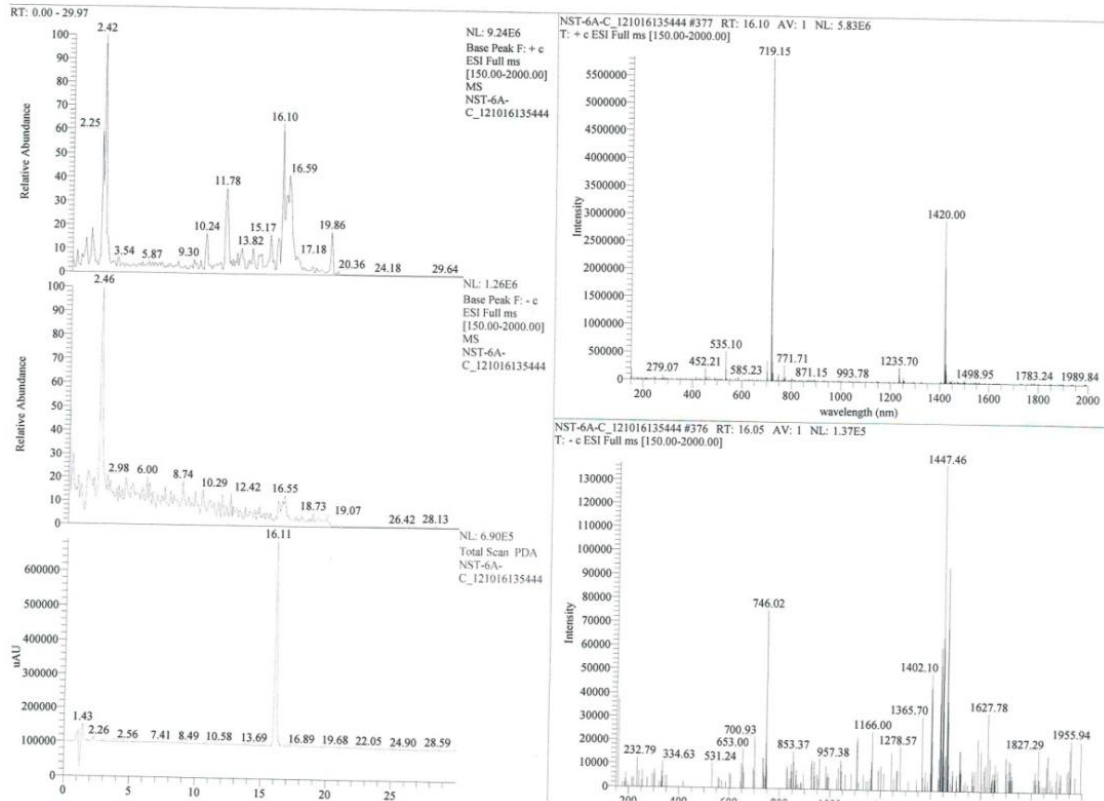

LC-ESI-MS(-) (NST6A-C)

10/17/2012 2:31:51 PM -6A-D\_121017143151

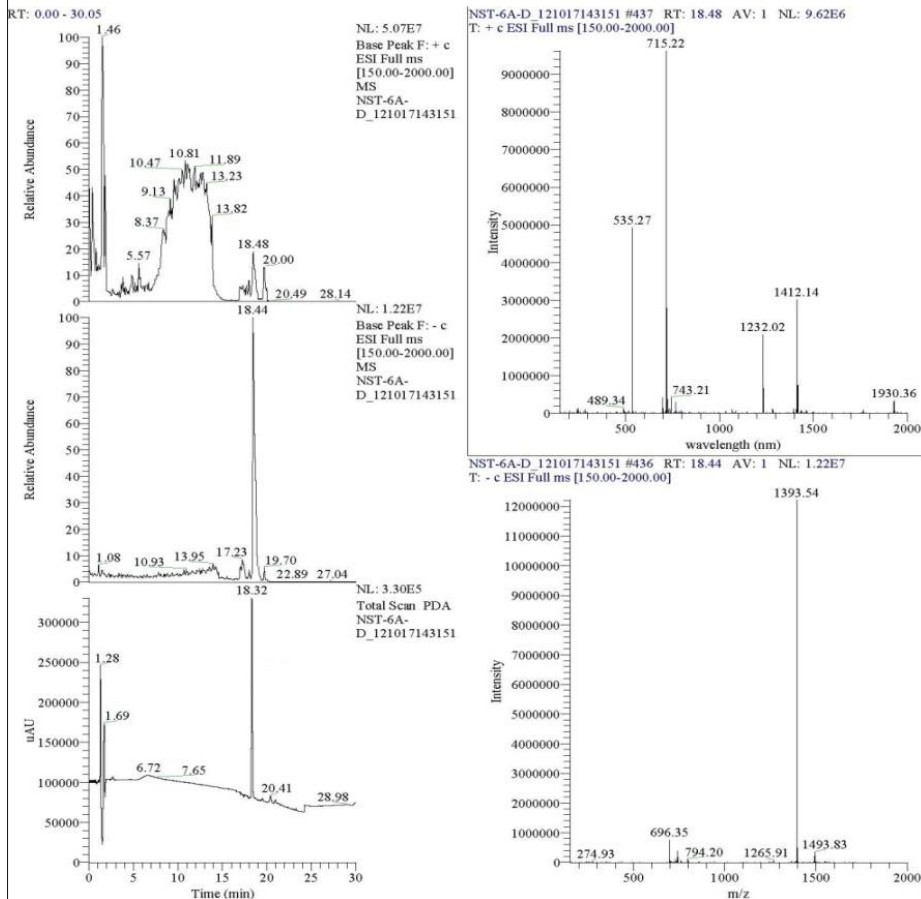

LC-ESI-MS(-) (NST6A-D)

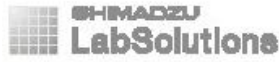

# Analysis Report

## <Sample Information>

|                  |                        |              |                        |
|------------------|------------------------|--------------|------------------------|
| Sample Name      | : NST001               | Level        | : 1                    |
| Data Filename    | : NST001               | Acquired by  | : Administrator        |
| Method Filename  | : 9-NC.lcm             | Processed by | : System Administrator |
| Vial #           | :                      |              |                        |
| Injection Volume | : 20 uL                |              |                        |
| Date Acquired    | : 6/8/2012 5:16:04 AM  |              |                        |
| Date Processed   | : 6/16/2014 3:33:03 PM |              |                        |

## <Chromatogram>

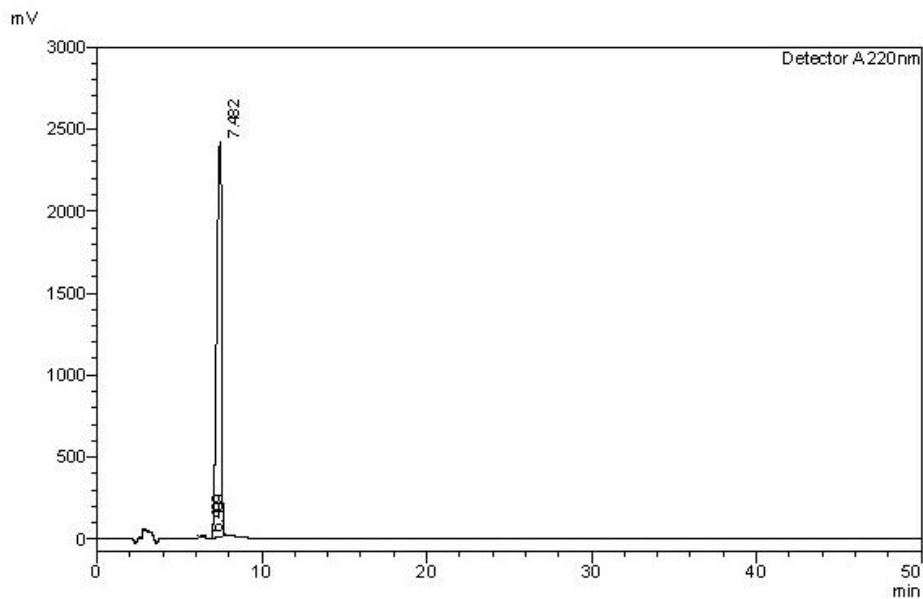

## <Peak Table>

| Peak  | Ret. Time | Area     | Area%   | Height  | tical Plates/mete |
|-------|-----------|----------|---------|---------|-------------------|
| 1     | 6.499     | 106181   | 0.213   | 10193   | 65320             |
| 2     | 7.482     | 49678504 | 99.787  | 2410630 | 20932             |
| Total |           | 49784685 | 100.000 | 2420823 |                   |

D:\220nm\NST001.lcd

### HPLC purity (NST001)

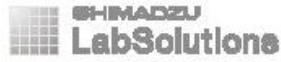

# Analysis Report

## <Sample Information>

|                  |                        |              |                        |
|------------------|------------------------|--------------|------------------------|
| Sample Name      | : NST001A              | Level        | : 1                    |
| Data Filename    | : NST001A              | Acquired by  | : Administrator        |
| Method Filename  | : CV.lcm               | Processed by | : System Administrator |
| Vial #           | :                      |              |                        |
| Injection Volume | : 20 uL                |              |                        |
| Date Acquired    | : 3/12/2012 9:55:35 PM |              |                        |
| Date Processed   | : 6/16/2014 2:57:27 PM |              |                        |

## <Chromatogram>

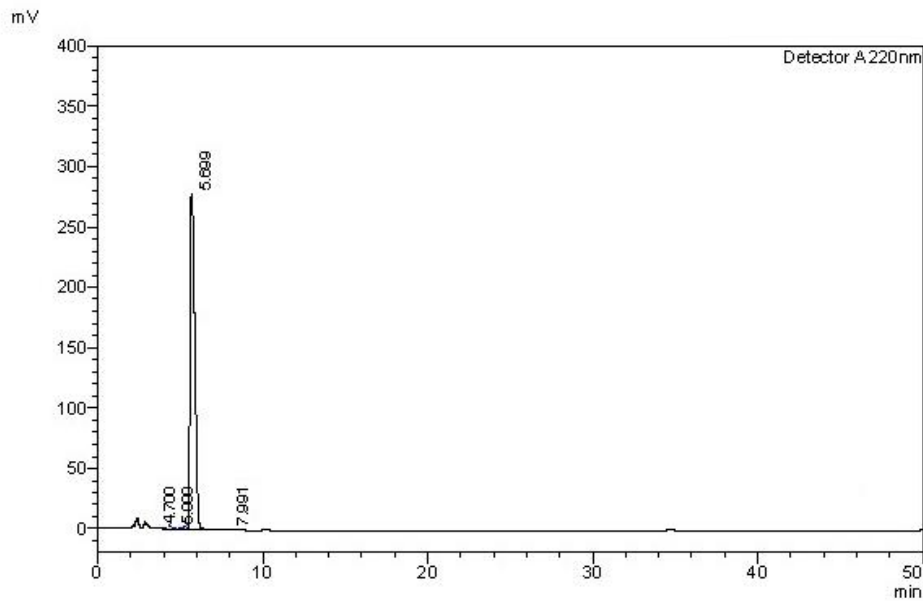

## <Peak Table>

| Peak  | Ret. Time | Area    | Area%   | Height | tical Plates/mete |
|-------|-----------|---------|---------|--------|-------------------|
| 1     | 4.700     | 5808    | 0.104   | 809    | 56660             |
| 2     | 5.000     | 4310    | 0.077   | 674    | 80269             |
| 3     | 5.699     | 5588448 | 99.742  | 278144 | 12420             |
| 4     | 7.991     | 4354    | 0.078   | 483    | 98610             |
| Total |           | 5602919 | 100.000 | 280109 |                   |

D:\220nm\20121030-4.lcd

### HPLC purity (NST001A)



# Analysis Report

**<Sample Information>**

|                  |                         |              |                 |
|------------------|-------------------------|--------------|-----------------|
| Sample Name      | : NST001B               | Level        | : 1             |
| Data Filename    | : NST001B               | Acquired by  | : Administrator |
| Method Filename  | : NST analog.lcm        | Processed by | : Administrator |
| Vial #           | :                       |              |                 |
| Injection Volume | : 20 uL                 |              |                 |
| Date Acquired    | : 6/12/2014 8:56:17 PM  |              |                 |
| Date Processed   | : 6/15/2014 11:01:04 PM |              |                 |

**<Chromatogram>**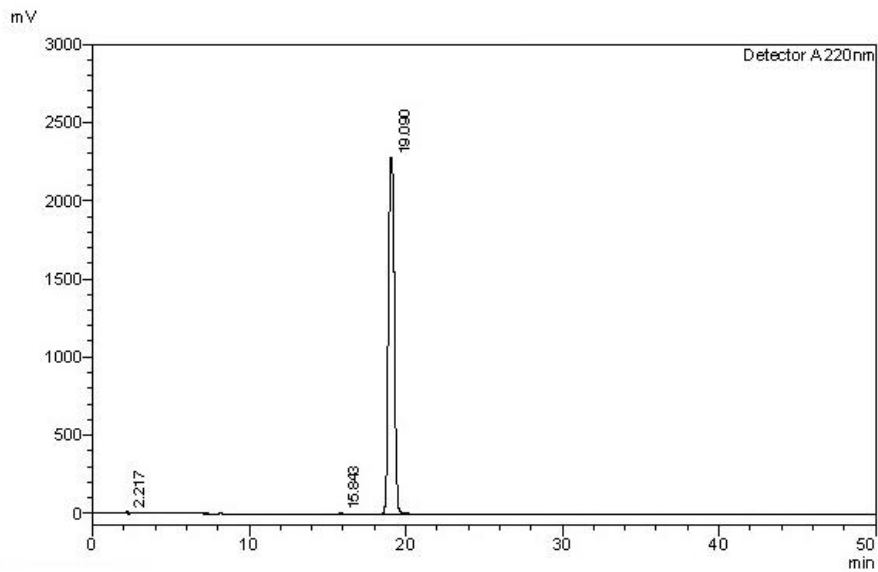**<Peak Table>**

| Detector A.220nm |           |          |         |         |                   |
|------------------|-----------|----------|---------|---------|-------------------|
| Peak             | Ret. Time | Area     | Area%   | Height  | tical Plates/metc |
| 1                | 2.217     | 20950    | 0.036   | 14049   | 27390             |
| 2                | 15.843    | 51080    | 0.087   | 3036    | 126111            |
| 3                | 19.090    | 58596749 | 99.877  | 2280134 | 99228             |
| Total            |           | 58668780 | 100.000 | 2297220 |                   |

G:\220nm\NST14.lcd

**HPLC purity (NST001B)**



# Analysis Report

**<Sample Information>**

|                  |                         |              |                 |
|------------------|-------------------------|--------------|-----------------|
| Sample Name      | : NST6A-A               | Level        | : 1             |
| Data Filename    | : NST6A-A               | Acquired by  | : Administrator |
| Method Filename  | : NST analog.lcm        | Processed by | : Administrator |
| Vial #           | :                       |              |                 |
| Injection Volume | : 20 uL                 |              |                 |
| Date Acquired    | : 6/13/2014 1:26:24 AM  |              |                 |
| Date Processed   | : 6/15/2014 11:06:32 PM |              |                 |

**<Chromatogram>**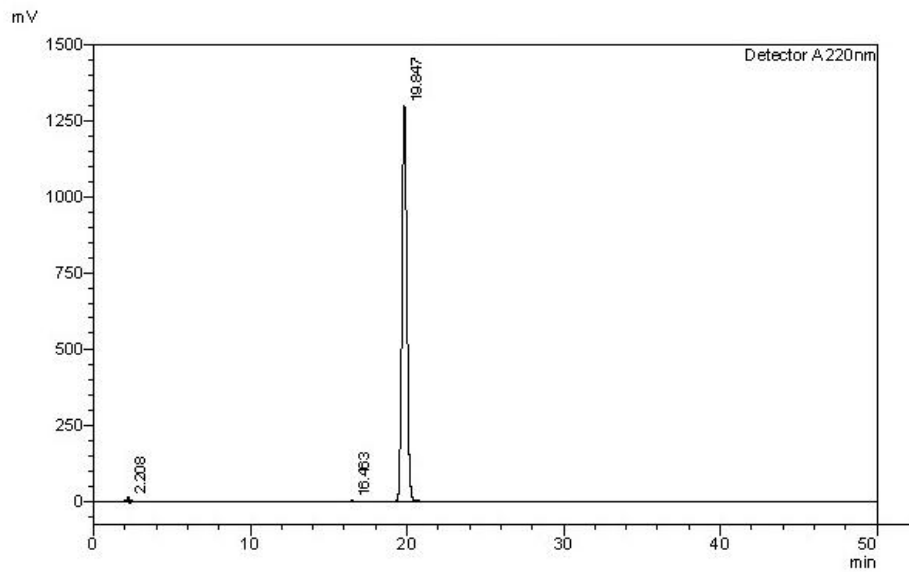**<Peak Table>**

| Detector A 220nm |           |          |         |         |                          |
|------------------|-----------|----------|---------|---------|--------------------------|
| Peak             | Ret. Time | Area     | Area%   | Height  | Theoretical Plates/meter |
| 1                | 2.208     | 48158    | 0.168   | 13138   | 22329                    |
| 2                | 16.463    | 21454    | 0.075   | 1241    | 132149                   |
| 3                | 19.847    | 28523582 | 99.757  | 1296761 | 124165                   |
| Total            |           | 28593195 | 100.000 | 1311140 |                          |

G:\220nm\NST18.lcd

**HPLC purity (NST6A-A)**



# Analysis Report

**<Sample Information>**

|                  |                         |              |                 |
|------------------|-------------------------|--------------|-----------------|
| Sample Name      | : NST6A-B               | Level        | : 1             |
| Data Filename    | : NST6A-B               | Acquired by  | : Administrator |
| Method Filename  | : NST analog.lcm        | Processed by | : Administrator |
| Vial #           | :                       |              |                 |
| Injection Volume | : 20 uL                 |              |                 |
| Date Acquired    | : 6/12/2014 11:02:15 PM |              |                 |
| Date Processed   | : 6/15/2014 11:03:16 PM |              |                 |

**<Chromatogram>**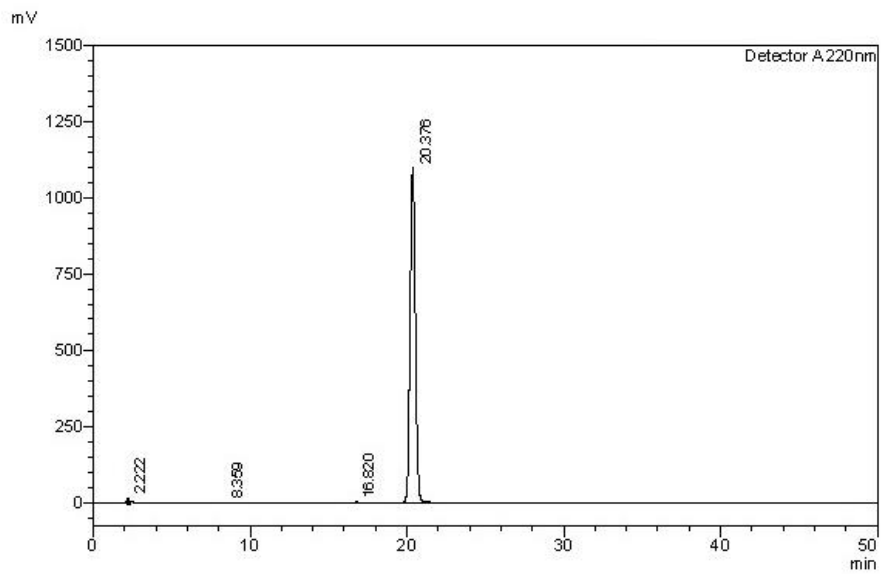**<Peak Table>**

| Peak  | Ret. Time | Area     | Area%   | Height  | tical Plates/meter |
|-------|-----------|----------|---------|---------|--------------------|
| 1     | 2.222     | 126424   | 0.498   | 19608   | 19755              |
| 2     | 8.359     | 6567     | 0.026   | 555     | 90775              |
| 3     | 16.820    | 18350    | 0.072   | 1041    | 136576             |
| 4     | 20.376    | 25238468 | 99.404  | 1099030 | 120472             |
| Total |           | 25389807 | 100.000 | 1120233 |                    |

G:\220nm\NST16.lcd

**HPLC purity (NST6A-B)**



# Analysis Report

**<Sample Information>**

Sample Name : NST6A-C  
 Data Filename : NST6A-C  
 Method Filename : NST analog.lcm  
 Vial # :  
 Injection Volume : 20 uL  
 Date Acquired : 6/13/2014 12:16:45 AM  
 Date Processed : 6/15/2014 11:06:20 PM

Level : 1  
 Acquired by : Administrator  
 Processed by : Administrator

**<Chromatogram>**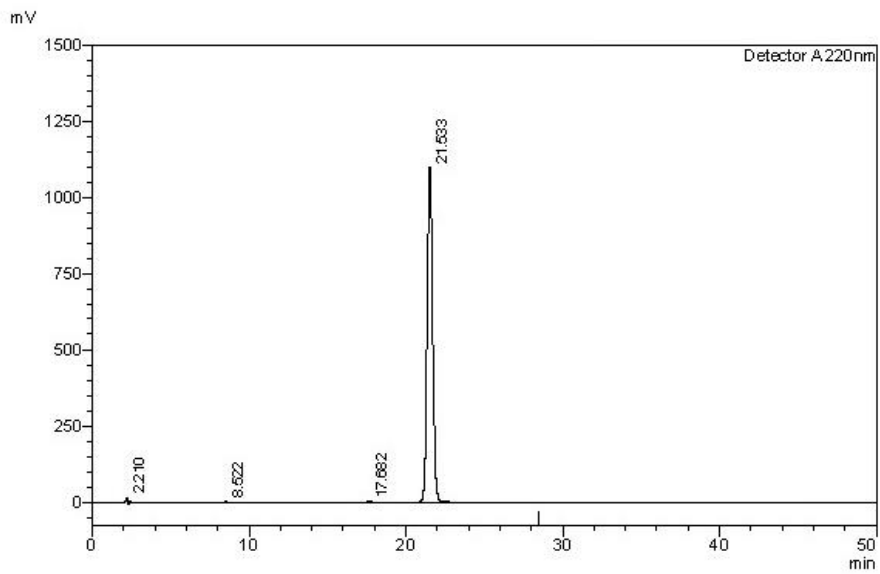**<Peak Table>**

| Peak  | Ret. Time | Area     | Area%   | Height  | tical Plates/meter |
|-------|-----------|----------|---------|---------|--------------------|
| 1     | 2.210     | 41428    | 0.155   | 13704   | 24148              |
| 2     | 8.522     | 7558     | 0.028   | 713     | 86112              |
| 3     | 17.682    | 19648    | 0.073   | 1065    | 142391             |
| 4     | 21.533    | 26734204 | 99.744  | 1097037 | 119743             |
| Total |           | 26802838 | 100.000 | 1112520 |                    |

G:\220nm\NST17.lcd

**HPLC purity (NST6A-C)**

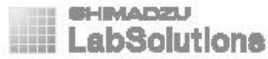

# Analysis Report

## <Sample Information>

Sample Name : NST6A-D  
 Data Filename : NST6A-D  
 Method Filename : NST analog.lcm  
 Vial # :  
 Injection Volume : 20  $\mu$ L  
 Date Acquired : 6/12/2014 10:04:20 PM  
 Date Processed : 6/16/2014 3:19:27 PM

Level : 1  
 Acquired by : Administrator  
 Processed by : System Administrator

## <Chromatogram>

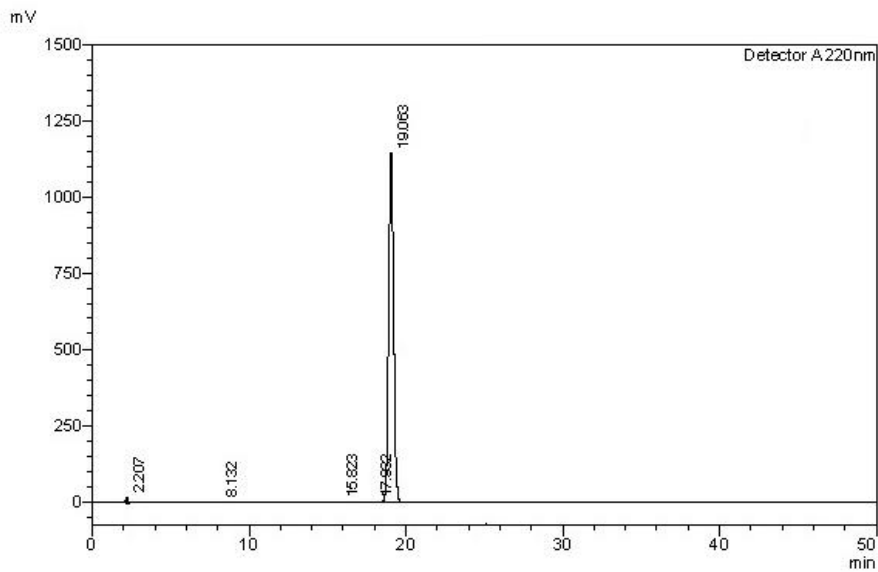

## <Peak Table>

Detector A.220nm

| Peak  | Ret. Time | Area     | Area%   | Height  | tical Plates/mete |
|-------|-----------|----------|---------|---------|-------------------|
| 1     | 2.207     | 126461   | 0.510   | 19650   | 19741             |
| 2     | 8.132     | 3415     | 0.014   | 351     | 132585            |
| 3     | 15.823    | 15027    | 0.061   | 1006    | 131581            |
| 4     | 17.932    | 3526     | 0.014   | 205     | 95991             |
| 5     | 19.063    | 24643514 | 99.401  | 1144638 | 119765            |
| Total |           | 24791942 | 100.000 | 1165852 |                   |

G:\220nm\NST15.lcd

HPLC purity (NST6A-D)
